# Supplementary material for: A phase-separated transcription factor regulates an interspecific barrier
Source: Research Square preprint supplement (doi:10.21203/rs.3.rs-2015853/v1), 2022-10-28
Supplement: Supplementary file 1 [file 0334263377b8246a1f6f7a54.xlsx]

## Sheet: oligos
Purpose	Description of PCR amplification	Forward primer name	Forward sequence (5' to 3')	Reverse primer name	Reverse sequence 5' to 3'
Primers used for the stable expression of SPRI2-Venus	Yields SPRI2 promoter to stop codon fragment	1338/If-pBI121Hind-SRS7-F	TGATTACGCCAAGCTTCACCCACTAGAACTAAACATGC	1341/SRS7CDS-linker-Venus-R2	tcctcgcccttgctcacTGAGCCTCCCCCACACCTAGAAGATGCAAAGA
Primers used for the stable expression of SPRI2-Venus	Yields Venus fragment	1340/SRS7CDS-linker-Venus-F2	TCTTTGCATCTTCTAGGTGTGGGGGAGGCTCAgtgagcaagggcgagga	1343/Venus-SRS7_3UTR-R	CATCTTCAGATGTTTTAATCTCATTACTTGTACAGCTCGTCC
Primers used for the stable expression of SPRI2-Venus	Yields SPRI2 3'UTR fragment	1342/Venus-SRS7_3UTR-F	GGACGAGCTGTACAAGTAATGAGATTAAAACATCTGAAGATG	1339/If-pBI121Eco-SRS7-R	GACGGCCAGTGAATTCCATCACCAGCCAGAAAGC
Primers used for the transient expression of SPRI2-Venus	Yields SPRI2 coding region + Venus fragment	22/BamHⅠ_SRS7_F	GGGGGACTCTGAGGATCCATGGCTGGATTGTTCTAT	IfpBI121Sac-Venus-R	gatcggggaaattcgagctcTCACTTGTACAGCTCGTCC
Primers used for the Quikchange mutagenesis to create Δprion-core	Yields mutagenized linearized Δprion-core fragment	1970/qcSPRI2_prion-del2-F	GAGATTTTCCCTCCTCAATATTTT CATGCGGCTGCTCCAACAAATCTC	1971/qcSPRI2_prion-del2-R	GAGATTTGTTGGAGCAGCCGCATG AAAATATTGAGGAGGGAAAATCTC
For creating spri2-1_spri2-like-1 generating construct by the “Sequence of two gRNA expression cassettes for dicots”	Yields SPRI2 gRNA2 - SPRI2-like gRNA2 fragment	795/SRS7-SRS5_Bsa-long-F2	AATAATGGTCTCTATTGTGTTTGGCAATCAAACCCTGTTTTAGAGCTAGAAATAGC	796/SRS7-SRS5_Bsa-long-R2	ATTATTGGTCTCTAAACCAGCTCCTGCAAACTTCTACAATCTCTTAGTCGACTCTAC
For creating spri2-2 generating construct by the “Sequence of two gRNA expression cassettes for dicots”	Yields SPRI2_gRNA2 - SPRI2_gRNA4 fragment	795/SRS7-SRS5_Bsa-long-F2	AATAATGGTCTCTATTGTGTTTGGCAATCAAACCCTGTTTTAGAGCTAGAAATAGC	1047/SRS7-gRNA4-R1	ATTATTGGTCTCTAAACATCATGAGCCGGTGAGATCCAATCTCTTAGTCGACTCTAC
For creating spri2-2 generating construct by the “Sequence of two gRNA expression cassettes for dicots”	Yields SPRI2-like_gRNA2 - SPRI2-like_gRNA3 fragment	1048/SRS5-gRNA3-F1	AATAATGGTCTCTATTGTAGTCTCCGATCATGAGCCGTTTTAGAGCTAGAAATAGC	796/SRS7-SRS5_Bsa-long-R2	ATTATTGGTCTCTAAACCAGCTCCTGCAAACTTCTACAATCTCTTAGTCGACTCTAC
For creating shi generating construct by the “Sequence of two gRNA expression cassettes for dicots”	Yields SHI_gRNA1 - gRNA2 fragment	1302/SHI_gRNA1-F	AATAATGGTCTCTATTGGATCTTTACACTTCCGCTGGTTTTAGAGCTAGAAATAGC	1303/SHI_gRNA2-R	ATTATTGGTCTCTAAACCCGACGAGCTAACTTCCGGCAATCTCTTAGTCGACTCTAC
For creating sty1 generating construct by the “Sequence of two gRNA expression cassettes for dicots”	Yields STY1_gRNA1 - gRNA2 fragment	1306/STY1_gRNA1-F	AATAATGGTCTCTATTGCGATGATGATGATTCGTAGGTTTTAGAGCTAGAAATAGC	1307/STY1_gRNA2-R	ATTATTGGTCTCTAAACCCGATGAACTCACCTCCGCCAATCTCTTAGTCGACTCTAC
For creating sty2 generating construct by the “Sequence of two gRNA expression cassettes for dicots”	Yields STY2_gRNA1 - gRNA2 fragment	1310/STY2_gRNA1-F	AATAATGGTCTCTATTGCACGTGGATCCCCGTTGCGGTTTTAGAGCTAGAAATAGC	1311/STY2_gRNA2-R	ATTATTGGTCTCTAAACCATCTGAGCTCACTTccccCAATCTCTTAGTCGACTCTAC
For creating lrp generating construct by the “Sequence of two gRNA expression cassettes for dicots”	Yields LRP1_gRNA1 - gRNA2 fragment	1314/LRP1_gRNA1-F	AATAATGGTCTCTATTGCTTATCACCACCAGAACGCGTTTTAGAGCTAGAAATAGC	1315/LRP1_gRNA2-R	ATTATTGGTCTCTAAACCCAGCCGTTGGATTAGCGCCAATCTCTTAGTCGACTCTAC
For creating srs3 generating construct by the “Sequence of two gRNA expression cassettes for dicots”	Yields SRS3_gRNA1 - gRNA2 fragment	1318/SRS3_gRNA1-F	AATAATGGTCTCTATTGATGTGAGTTTGGCAATGGAGTTTTAGAGCTAGAAATAGC	1319/SRS3_gRNA2-R	ATTATTGGTCTCTAAACAAAATGTCCAGGAGTAGTGCAATCTCTTAGTCGACTCTAC
For creating srs4 generating construct by the “Sequence of two gRNA expression cassettes for dicots”	Yields SRS4_gRNA1 - gRNA2 fragment	1322/SRS4_gRNA1-F	AATAATGGTCTCTATTGGATCCACGTGCTCCTCACGGTTTTAGAGCTAGAAATAGC	1323/SRS4_gRNA2-R	ATTATTGGTCTCTAAACTATTGGCCCTCTCCATCATCAATCTCTTAGTCGACTCTAC
For creating srs6 generating construct by the “Sequence of two gRNA expression cassettes for dicots”	Yields SRS6_gRNA1 - gRNA2 fragment	1326/SRS6_gRNA1-F	AATAATGGTCTCTATTGATGGCCGTGTTATCTGCGTGTTTTAGAGCTAGAAATAGC	1327/SRS6_gRNA2-R	ATTATTGGTCTCTAAACCGGTAACCCCTCTCTGAAGCAATCTCTTAGTCGACTCTAC
For creating tRNA-gRNA cassettes for tbl40_tbl45 generating construct	Yields tRNA-gRNA cassette fragment	1421/pHEE401E_tRNA-F	AATAATGGTCTCTATTG ACAAAGCACCAGTGG	Ln-TBL45_g1p_tRNA-R	cg GGTCTC c TCAGGTGGTTTT tgcaccagccgggaatc
For creating tRNA-gRNA cassettes for tbl40_tbl45 generating construct	Yields tRNA-gRNA cassette fragment	Ln-TBL45_g1p_scRNA-F	ta GGTCTC g CTGACTTCGGCG gttttagagctagaa	Ln-TBL45_g2p_tRNA-R	cg GGTCTC c AACCTGTGTGGC tgcaccagccgggaatc
For creating tRNA-gRNA cassettes for tbl40_tbl45 generating construct	Yields tRNA-gRNA cassette fragment	Ln-TBL45_g2p_scRNA-F	ta GGTCTC g GGTTCTTTACGA gttttagagctagaa	Ln-TBL45_g3p_tRNA-R	cg GGTCTC c TGAGATAGTCGG tgcaccagccgggaatc
For creating tRNA-gRNA cassettes for tbl40_tbl45 generating construct	Yields tRNA-gRNA cassette fragment	Ln-TBL45_g3p_scRNA-F	ta GGTCTC g CTCAAGTTCCGG gttttagagctagaa	Ln-TBL40_g1p_tRNA-R	cg GGTCTC c CCGTACGATCTC tgcaccagccgggaatc
For creating tRNA-gRNA cassettes for tbl40_tbl45 generating construct	Yields tRNA-gRNA cassette fragment	Ln-TBL40_g1p_scRNA-F	ta GGTCTC g ACGGCTGAAGTC gttttagagctagaa	Ln-TBL40_g2p_tRNA-R	cg GGTCTC c CTGAGTTTGACC tgcaccagccgggaatc
For creating tRNA-gRNA cassettes for tbl40_tbl45 generating construct	Yields tRNA-gRNA cassette fragment	Ln-TBL40_g2p_scRNA-F	ta GGTCTC g TCAGCCGTTCAT gttttagagctagaa	401E_TBL40_g3f_tRNA-R	ATTATTGGTCTCTAAAC AAGGGCAATCCTCCTGGATA tgcaccagccgggaatc
For genotyping genome-edited SPRI2 mutants	Yields SPRI2 fragment	846/SRS7-gRNA-F1	ACCAAACACATCTCCAAGCC	847/SRS7-gRNA-R1	CGTCATACCTGAAGAACTAGC
For genotyping genome-edited SPRI2-like mutants	Yields SPRI2-like fragment	848/SRS5-gRNA-F1	CCAGCAAACTTCCACTTTCAG	849/SRS5-gRNA-R1	TAGCAGCAGGAACCCAAGTG
For genotyping genome-edited SHI mutants	Yields SHI fragment	1304/SHI-F1	CTTACAAAGGAACCCTTGAG	1305/SHI-R1	CGTAGAGAACACCTTTGAAG
For genotyping genome-edited STY1 mutants	Yields STY1 fragment	1308/STY1-F1	GCAACATCAGCAAAGGTTGG	1309/STY1-R1	GGCAACAACGTTGTAGCCT
For genotyping genome-edited STY2 mutants	Yields STY2 fragment	1312/STY2-F1	GATCCATCACCATTAGCTGT	1313/STY2-R1	CCACTCATGTAGCTGCTTTC
For genotyping genome-edited LRP1 mutants	Yields LRP1 fragment	1316/LRP1-F1	GGTTTAGGCTCAGCTTCCGT	1317/LRP1-R1	GGTCTCGAAACTTTGAGGTG
For genotyping genome-edited SRS3 mutants	Yields SRS3 fragment	1320/SRS3-F1	ATGGGAAGGCAGAGGTAATG	1321/SRS3-R1	GATCGTGAAGAATCCCTCTG
For genotyping genome-edited SRS4 mutants	Yields SRS4 fragment	1324/SRS4-F1	GATCTCTAACGATAAGCTGTC	1325/SRS4-R1	ATCTTGGTGGGTTCTCGTAG
For genotyping genome-edited SRS6 mutants	Yields SRS6 fragment	1328/SRS6-F1	CGTCTCAATCCCACCTGATC	1329/SRS6-R1	AGCCTTTGAAGATATGACCAC
For genotyping genome-edited TBL40 mutants	Yields TBL40 fragment	104/TBL40-F1	GGCAGGATTATGGAGTGACG	105/TBL40-R1	GATGTGCGTCTTTGCGATAC
For genotyping genome-edited TBL45 mutants	Yields TBL45 fragment	193/TBL45_F2	CGTATTAGTAAGTTCCATGC	194/TBL45_R2	CTCTAGTGAGAGGAGAATTG
