# Supplementary material for: A phase-separated transcription factor regulates an interspecific barrier
Source: Research Square preprint supplement (doi:10.21203/rs.3.rs-2015853/v1), 2022-10-28
Supplement: Supplementary file 2 [file b56165914553f34aadf44cd0.xlsx]

## Sheet: Sheet1
gene	Col.0_1	Col.0_2	Col.0_4	spri2_1	spri2_2	spri2_3	spri2_4	spri2l_1	spri2l_2	spri2l_4	spri2spri2l_1	spri2spri2l_2	spri2spri2l_3	spri2spri2l_4	up/down in spri2/spri2l
AT3G44326	4.30107	6.98282	7.47025	3.14387	1.08628	0	0	5.42265	3.36577	2.9001	0	0	0	0	down
AT1G22480	1.43369	4.88797	10.7904	4.7158	3.25883	0	4.6223	2.71133	6.73154	4.35015	0	0	0	0	down
AT4G17390	64.5161	71.923	93.7931	28.2948	30.4158	29.8787	40.0599	65.0718	85.8272	69.6023	0	0	0.848459	0	down
AT1G55010	32.2581	22.345	9.96033	3.14387	1.08628	1.0303	1.54077	21.6906	5.04866	18.8506	0	0	0.848459	0	down
AT3G21090	7.8853	8.37938	13.2804	6.28773	3.25883	1.0303	9.2446	9.48964	11.7802	5.8002	0	0.911054	0	0	down
AT3G28007	17.9211	37.0089	26.5609	20.4351	15.2079	5.15149	12.3261	4.06699	5.04866	33.3511	0	0	0.848459	2.02141	down
AT2G36307	9.31899	6.98282	3.32011	3.14387	4.34511	4.12119	1.54077	6.77831	1.68289	5.8002	0	0	0.848459	0	down
AT3G25930	10.0358	6.98282	9.96033	0	5.43139	5.15149	1.54077	2.71133	3.36577	2.9001	0.990166	0	0	0.673802	down
AT4G22680	9.31899	11.1725	14.1105	11.0035	8.69022	13.3939	16.9484	12.201	5.04866	11.6004	0	1.82211	0	0.673802	down
AT2G30010	337.634	508.349	494.696	193.348	97.765	127.757	178.729	185.726	482.988	239.258	10.8918	46.4638	14.4238	25.6045	down
AT4G15350	13.6201	12.5691	9.96033	1.57193	3.25883	1.0303	6.16307	5.42265	10.0973	5.8002	0	0.911054	0.848459	1.3476	down
AT1G13635	11.4695	14.6639	17.4306	7.85967	7.60394	10.303	9.2446	12.201	21.8775	10.1503	0	1.82211	0.848459	1.3476	down
AT1G23200	33.6917	46.7849	45.6515	94.316	34.7609	49.4543	60.0899	1.35566	30.2919	11.6004	0.990166	1.82211	0.848459	8.75943	down
AT4G17220	55.914	52.3711	43.9915	29.8667	45.6237	37.0908	12.3261	29.8246	47.1208	33.3511	4.95083	3.64422	5.09075	2.69521	down
AT2G17940	8.60215	13.2674	18.2606	7.85967	7.60394	7.21209	13.8669	8.13398	5.04866	5.8002	0	2.73316	0.848459	1.3476	down
AT1G23730	10.0358	13.2674	31.5411	20.4351	29.3295	18.5454	20.03	10.8453	5.04866	21.7507	2.9705	2.73316	0	1.3476	down
AT1G06090	203.584	249.985	233.238	73.8809	134.698	117.454	78.5791	164.035	173.337	129.054	18.8132	24.5985	22.0599	23.5831	down
AT1G31720	7.16846	15.3622	17.4306	4.7158	3.25883	6.18179	3.08153	10.8453	18.5117	14.5005	0.990166	2.73316	0	2.02141	down
AT1G14240	36.5591	32.121	33.2011	18.8632	47.7962	22.6666	6.16307	21.6906	33.6577	30.451	1.98033	5.46632	5.09075	2.69521	down
AT5G37478	17.2043	25.8364	73.8725	37.7264	20.6393	11.3333	35.4376	17.6236	13.4631	24.6508	1.98033	6.37738	1.69692	8.08562	down
AT2G14095	15.0538	25.8364	17.4306	11.0035	30.4158	26.7878	4.6223	31.1802	20.1946	34.8012	0	1.82211	3.39384	4.04281	down
AT1G61550	9.31899	14.6639	10.7904	7.85967	5.43139	3.0909	7.70383	10.8453	6.73154	8.70029	0	0	0.848459	4.71661	down
AT4G12870	25.0896	31.4227	22.4107	28.2948	3.25883	2.0606	3.08153	8.13398	8.41443	2.9001	1.98033	3.64422	1.69692	5.39042	down
AT2G20100	25.8064	17.457	17.4306	17.2913	17.3804	21.6363	4.6223	5.42265	16.8289	11.6004	2.9705	6.37738	0	0.673802	down
AT3G13730	33.6917	18.1553	9.96033	0	5.43139	1.0303	1.54077	16.268	8.41443	27.5509	0	6.37738	2.54538	1.3476	down
AT5G40020	227.24	178.76	186.756	144.618	245.499	198.848	127.884	211.483	173.337	149.355	20.7935	40.0864	15.2723	22.9093	down
AT5G02090	74.552	93.5698	72.2124	36.1545	97.765	94.7875	75.4976	65.0718	75.7298	60.902	9.90166	18.2211	8.48459	4.71661	down
AT5G18840	10.7527	18.1553	30.711	23.579	13.0353	23.6969	12.3261	13.5566	15.146	10.1503	3.96066	0.911054	3.39384	2.02141	down
AT5G42210	12.9032	13.2674	21.5807	4.7158	6.51767	8.24239	13.8669	2.71133	11.7802	20.3007	0.990166	0.911054	4.2423	2.69521	down
AT2G47750	22.9391	23.7416	40.6714	26.7229	32.5883	35.0302	32.3561	39.3142	42.0721	36.2512	2.9705	7.28843	2.54538	4.04281	down
AT4G28500	12.1864	16.7588	18.2606	26.7229	7.60394	15.4545	18.4892	13.5566	11.7802	11.6004	1.98033	2.73316	1.69692	2.69521	down
AT1G03820	42.2939	12.5691	46.4815	17.2913	11.9491	27.8181	16.9484	17.6236	20.1946	23.2008	1.98033	7.28843	1.69692	8.75943	down
AT1G08340	13.6201	13.2674	20.7507	14.1474	10.8628	10.303	9.2446	12.201	15.146	7.25024	1.98033	3.64422	1.69692	2.02141	down
AT1G13130	35.8423	35.6124	30.711	17.2913	57.5727	32.9696	23.1115	52.8708	35.3406	29.001	1.98033	3.64422	8.48459	6.06422	down
AT1G54790	12.9032	9.07767	7.47025	9.4316	13.0353	10.303	4.6223	2.71133	16.8289	7.25024	0.990166	1.82211	1.69692	1.3476	down
AT1G58170	14.3369	6.28454	12.4504	3.14387	3.25883	4.12119	3.08153	2.71133	1.68289	4.35015	0.990166	0.911054	3.39384	1.3476	down
AT1G51035	49.4624	48.1815	26.5609	12.5755	64.0904	30.909	10.7854	54.2265	30.2919	68.1523	2.9705	8.19949	6.78767	7.41182	down
AT5G60720	32.9749	27.9313	34.0311	34.5825	20.6393	21.6363	27.7338	20.3349	23.5604	31.9011	4.95083	4.55527	4.2423	6.06422	down
AT5G22240	9.31899	14.6639	8.30028	7.85967	29.3295	16.4848	12.3261	20.3349	21.8775	7.25024	0.990166	2.73316	1.69692	1.3476	down
AT1G70500	93.9068	83.0956	70.5524	42.4422	78.212	76.2421	30.8153	94.8964	80.7785	46.4016	8.91149	25.5095	8.48459	9.43323	down
AT4G08160	92.4731	75.4145	97.1132	62.8773	112.973	73.1512	52.3861	108.453	75.7298	76.8526	12.8722	20.9542	13.5753	8.75943	down
AT5G48920	93.9068	107.535	86.3229	66.0212	178.15	150.424	63.1714	109.809	134.631	97.1533	15.8427	23.6874	12.7269	8.75943	down
AT5G08070	17.9211	9.77595	12.4504	23.579	16.2942	14.4242	18.4892	9.48964	3.36577	5.8002	3.96066	1.82211	0.848459	2.02141	down
AT1G58370	25.0896	38.4055	46.4815	17.2913	76.0394	54.6058	27.7338	56.9378	60.5839	31.9011	5.941	5.46632	7.63613	4.71661	down
AT1G12260	73.8351	83.0956	53.9518	37.7264	73.8669	51.5149	46.223	32.5359	52.1694	50.7517	7.92133	18.2211	9.33305	10.7808	down
AT4G00220	47.3118	45.3883	51.4617	26.7229	40.1923	48.424	30.8153	39.3142	33.6577	21.7507	2.9705	15.4879	5.09075	8.75943	down
AT1G43790	276.702	282.804	307.94	157.193	371.507	289.514	126.343	226.396	269.262	220.407	31.6853	63.7738	59.3921	40.4281	down
AT2G45420	11.4695	16.7588	15.7705	14.1474	9.7765	11.3333	13.8669	12.201	11.7802	2.9001	1.98033	0.911054	1.69692	5.39042	down
AT1G62935	10.0358	10.4742	8.30028	4.7158	5.43139	2.0606	4.6223	8.13398	8.41443	2.9001	0.990166	1.82211	2.54538	1.3476	down
AT1G05310	44.4444	48.8797	48.9716	31.4387	65.1767	43.2725	38.5192	37.9586	60.5839	49.3017	8.91149	11.8437	9.33305	3.36901	down
AT1G32100	256.631	200.407	194.226	146.19	259.62	176.181	141.751	180.303	205.312	171.106	39.6066	56.4853	33.9384	24.2569	down
AT2G30080	12.9032	9.07767	14.9405	4.7158	6.51767	5.15149	10.7854	8.13398	3.36577	7.25024	1.98033	3.64422	2.54538	0.673802	down
AT5G13170	658.781	416.874	190.906	363.117	315.021	226.666	140.21	624.96	321.431	490.116	88.1248	30.0648	50.9075	141.498	down
AT1G10460	14.3369	6.28454	12.4504	4.7158	7.60394	7.21209	9.2446	1.35566	3.36577	5.8002	1.98033	1.82211	1.69692	2.69521	down
AT2G32510	20.0717	9.77595	9.96033	1.57193	7.60394	4.12119	3.08153	9.48964	8.41443	15.9505	0.990166	4.55527	1.69692	2.69521	down
AT1G77330	36.5591	71.923	83.0028	50.3019	20.6393	19.5757	26.193	21.6906	65.6325	26.1009	12.8722	10.9326	11.03	14.1498	down
AT5G03260	15.0538	11.8708	12.4504	11.0035	21.7256	18.5454	13.8669	13.5566	20.1946	7.25024	2.9705	4.55527	0	2.69521	down
AT2G17710	402.867	403.607	136.125	146.19	198.789	176.181	143.291	380.941	331.528	171.106	64.3608	58.3075	48.3622	80.8562	down
AT4G17410	22.2222	18.1553	23.2408	11.0035	14.1216	25.7575	21.5707	29.8246	11.7802	17.4006	2.9705	7.28843	3.39384	3.36901	down
AT4G33810	114.695	78.9059	112.884	86.4563	157.51	146.302	63.1714	109.809	107.705	97.1533	15.8427	25.5095	24.6053	16.8451	down
AT4G18550	17.2043	16.0605	6.64022	9.4316	21.7256	10.303	9.2446	17.6236	11.7802	14.5005	0.990166	4.55527	2.54538	2.69521	down
AT3G59845	149.104	153.622	210.827	146.19	103.196	149.393	154.077	56.9378	131.265	117.454	25.7443	46.4638	21.2115	49.1875	down
AT5G62230	15.0538	10.4742	14.1105	7.85967	13.0353	9.27269	6.16307	8.13398	6.73154	10.1503	1.98033	3.64422	3.39384	2.02141	down
AT3G50220	38.7097	33.5175	48.9716	42.4422	29.3295	25.7575	29.2746	27.1133	25.2433	20.3007	7.92133	14.5769	2.54538	8.75943	down
AT1G68620	36.5591	22.345	19.0906	3.14387	13.0353	0	1.54077	20.3349	10.0973	27.5509	0.990166	14.5769	2.54538	4.04281	down
AT1G61560	61.6487	101.251	87.1529	39.2983	24.9844	24.7272	24.6523	46.0925	82.4614	34.8012	12.8722	15.4879	22.0599	20.8879	down
AT1G09890	17.2043	28.6296	21.5807	14.1474	22.8118	21.6363	24.6523	12.201	15.146	13.0504	0	11.8437	5.09075	2.69521	down
AT2G37090	47.3118	44.69	91.303	53.4457	29.3295	33.9999	44.6822	43.3812	35.3406	46.4016	11.882	15.4879	10.1815	16.1712	down
AT5G54130	24.3728	21.6467	26.5609	17.2913	16.2942	27.8181	33.8969	17.6236	15.146	13.0504	6.93116	9.11054	2.54538	2.69521	down
AT1G24030	15.0538	23.0433	17.4306	12.5755	10.8628	12.3636	15.4077	14.9123	11.7802	11.6004	5.941	3.64422	3.39384	3.36901	down
AT3G16920	178.495	155.717	227.428	198.064	155.338	175.151	174.107	155.901	169.971	118.904	36.6361	58.3075	25.4538	45.1447	down
AT5G35715	21.5054	17.457	24.9008	14.1474	13.0353	6.18179	15.4077	0	10.0973	4.35015	3.96066	7.28843	1.69692	6.06422	down
AT1G66230	37.276	34.2158	44.8215	18.8632	27.1569	13.3939	13.8669	9.48964	15.146	26.1009	5.941	8.19949	10.1815	11.4546	down
AT1G55180	16.4875	25.1382	16.6006	23.579	32.5883	15.4545	15.4077	37.9586	23.5604	13.0504	3.96066	7.28843	3.39384	3.36901	down
AT3G22415	104.659	60.0522	113.714	56.5896	87.9885	55.6361	47.7638	43.3812	45.4379	44.9515	21.7837	32.7979	13.5753	18.1927	down
AT3G55990	37.276	32.8193	44.8215	55.0177	19.553	26.7878	38.5192	24.4019	33.6577	42.0514	3.96066	18.2211	3.39384	10.107	down
AT5G12300	17.9211	23.7416	41.5014	29.8667	34.7609	25.7575	24.6523	23.0463	20.1946	8.70029	6.93116	11.8437	2.54538	4.71661	down
AT2G03200	29.3907	24.4399	24.0708	28.2948	26.0707	35.0302	20.03	21.6906	28.6091	17.4006	3.96066	5.46632	4.2423	10.7808	down
AT3G52900	120.43	102.647	156.045	88.0283	105.369	97.8784	83.2014	85.4067	106.022	102.953	25.7443	48.2859	16.9692	28.2997	down
AT5G07800	55.914	48.1815	50.6317	56.5896	38.0197	20.606	35.4376	36.6029	33.6577	31.9011	8.91149	16.399	10.1815	13.476	down
AT1G27440	48.7455	42.5952	63.9121	67.5931	33.6746	35.0302	47.7638	33.8916	50.4866	42.0514	14.8525	12.7548	10.1815	11.4546	down
AT5G22090	83.871	69.8282	92.1331	48.7299	67.3492	53.5755	50.8453	73.2058	62.2668	82.6528	20.7935	20.0432	11.03	26.2783	down
AT1G20850	530.466	453.883	625.011	493.587	533.362	508.968	509.994	485.327	546.938	439.365	104.958	198.61	92.482	117.915	down
AT1G28470	18.638	13.9656	23.2408	22.0071	19.553	20.606	6.16307	6.77831	11.7802	10.1503	3.96066	8.19949	5.09075	0.673802	down
AT1G02335	322.581	266.045	336.161	289.236	392.146	360.605	197.218	258.932	331.528	271.159	60.4001	109.326	61.9375	66.7064	down
AT3G21550	280.287	282.106	333.671	235.79	435.597	366.786	234.197	374.163	358.455	403.114	51.4886	96.5717	60.2406	82.2038	down
AT5G59845	32.2581	18.8536	16.6006	20.4351	27.1569	12.3636	7.70383	17.6236	18.5117	23.2008	0.990166	10.9326	3.39384	6.73802	down
AT3G24460	48.7455	32.8193	32.3711	20.4351	29.3295	14.4242	15.4077	20.3349	35.3406	34.8012	8.91149	9.11054	5.09075	14.1498	down
AT5G22630	442.294	397.322	400.073	124.183	172.718	149.393	112.476	165.391	220.458	207.357	99.0166	124.814	103.512	80.1824	down
AT1G66690	65.233	53.7677	75.5325	62.8773	82.5571	77.2724	63.1714	71.8501	58.901	65.2522	11.882	26.4206	11.8784	14.1498	down
AT4G33330	21.5054	14.6639	26.5609	22.0071	11.9491	16.4848	18.4892	5.42265	23.5604	15.9505	6.93116	4.55527	3.39384	6.06422	down
AT1G46480	19.3548	13.2674	33.2011	17.2913	13.0353	13.3939	16.9484	10.8453	20.1946	17.4006	2.9705	9.11054	3.39384	6.73802	down
AT1G77680	81.0036	24.4399	112.054	34.5825	29.3295	35.0302	26.193	74.5614	35.3406	158.055	14.8525	20.0432	21.2115	17.5189	down
AT1G51170	59.4982	63.5437	58.1019	34.5825	29.3295	27.8181	24.6523	55.5822	42.0721	42.0514	19.8033	11.8437	13.5753	16.1712	down
AT5G03510	30.1075	22.345	24.0708	23.579	23.8981	31.9393	13.8669	16.268	28.6091	26.1009	2.9705	11.8437	1.69692	9.43323	down
AT5G60660	72.4014	70.5265	67.2322	55.0177	72.7806	59.7573	57.0084	84.0511	84.1443	49.3017	15.8427	31.8869	11.03	12.8022	down
AT2G03090	69.534	54.466	60.592	26.7229	22.8118	40.1816	30.8153	29.8246	28.6091	13.0504	16.8328	16.399	13.5753	16.1712	down
AT2G36570	40.1434	11.8708	32.3711	15.7193	23.8981	38.1211	12.3261	21.6906	20.1946	20.3007	8.91149	5.46632	5.09075	9.43323	down
AT5G50930	38.7097	50.9746	53.9518	20.4351	19.553	17.5151	16.9484	84.0511	109.388	71.0524	17.823	14.5769	5.93921	11.4546	down
AT2G38080	342.652	298.865	522.087	429.138	369.334	390.483	400.599	341.627	447.648	278.409	67.3313	150.324	78.9067	107.808	down
AT5G15630	47.3118	45.3883	62.2521	59.7335	22.8118	33.9999	55.4676	39.3142	37.0235	37.7013	11.882	15.4879	12.7269	14.1498	down
AT5G06610	30.8244	23.7416	39.0113	50.3019	15.2079	33.9999	29.2746	29.8246	37.0235	24.6508	4.95083	15.4879	4.2423	8.08562	down
AT2G16720	86.7383	48.1815	29.881	29.8667	24.9844	28.8484	21.5707	23.0463	26.9262	13.0504	9.90166	7.28843	25.4538	15.4974	down
AT4G18780	17.2043	21.6467	29.051	20.4351	14.1216	10.303	12.3261	9.48964	16.8289	20.3007	4.95083	8.19949	6.78767	4.04281	down
AT4G27435	111.111	108.234	178.456	182.344	114.059	139.09	144.832	108.453	114.436	85.5529	26.7345	47.3748	16.1207	51.209	down
AT4G31910	50.896	41.1986	77.1926	40.8703	39.106	47.3937	52.3861	42.0255	60.5839	56.5519	15.8427	26.4206	2.54538	15.4974	down
AT5G01190	22.9391	48.1815	50.6317	37.7264	29.3295	25.7575	30.8153	27.1133	33.6577	26.1009	7.92133	16.399	11.03	8.08562	down
AT5G40960	64.5161	34.2158	32.3711	23.579	5.43139	7.21209	13.8669	24.4019	6.73154	24.6508	21.7837	7.28843	4.2423	13.476	down
AT1G58070	97.491	82.3973	92.1331	89.6002	89.0748	97.8784	64.7122	93.5407	100.973	94.2532	23.764	28.2427	19.5146	26.2783	down
AT4G00230	42.2939	70.5265	48.1416	26.7229	59.7453	56.6664	55.4676	55.5822	58.901	43.5015	10.8918	13.6658	15.2723	18.1927	down
AT4G26580	25.8064	19.5519	22.4107	40.8703	23.8981	23.6969	30.8153	8.13398	16.8289	26.1009	3.96066	6.37738	6.78767	7.41182	down
AT5G61340	37.9928	30.0261	56.4419	42.4422	27.1569	43.2725	47.7638	42.0255	26.9262	40.6014	7.92133	12.7548	7.63613	16.8451	down
AT1G01520	73.8351	29.3278	28.2209	3.14387	6.51767	7.21209	9.2446	1.35566	6.73154	7.25024	10.8918	9.11054	10.1815	17.5189	down
AT4G09990	15.0538	20.9485	30.711	25.1509	14.1216	13.3939	6.16307	12.201	18.5117	23.2008	6.93116	8.19949	1.69692	7.41182	down
AT5G53590	24.3728	23.7416	24.9008	23.579	15.2079	22.6666	18.4892	13.5566	20.1946	23.2008	8.91149	4.55527	5.93921	7.41182	down
AT1G03850	15.7706	18.8536	13.2804	17.2913	23.8981	14.4242	24.6523	17.6236	11.7802	27.5509	4.95083	3.64422	1.69692	7.41182	down
AT1G79110	14.3369	18.8536	22.4107	17.2913	18.4667	9.27269	7.70383	14.9123	13.4631	14.5005	3.96066	5.46632	5.93921	5.39042	down
AT1G23460	57.3477	81.699	82.1727	75.4528	80.3846	73.1512	66.253	78.6284	77.4127	58.002	19.8033	31.8869	16.1207	14.8236	down
AT3G27200	371.326	379.167	566.079	507.734	221.601	299.817	405.222	287.4	355.089	333.511	91.0953	164.901	102.664	133.413	down
AT1G63295	39.4265	49.578	43.1614	25.1509	48.8825	23.6969	27.7338	44.7369	30.2919	50.7517	13.8623	16.399	11.03	8.75943	down
AT2G43120	75.9856	72.6213	96.2832	45.5861	107.541	90.6663	49.3045	58.2935	87.51	63.8021	21.7837	32.7979	16.1207	22.2355	down
AT3G54040	20.0717	20.9485	32.3711	33.0106	38.0197	27.8181	35.4376	25.7576	20.1946	18.8506	8.91149	10.0216	4.2423	4.71661	down
AT4G35350	241.577	230.433	240.708	144.618	232.463	234.908	221.87	261.643	306.285	229.108	52.4788	109.326	50.9075	59.2946	down
AT1G63120	422.939	347.744	457.345	419.706	505.119	411.089	335.887	437.879	398.844	305.96	88.1248	175.833	100.967	113.873	down
AT5G03210	377.061	358.917	110.394	105.32	139.044	123.636	135.587	61.0048	104.339	121.804	65.351	88.3722	65.3314	111.177	down
AT4G36220	27.957	41.8969	63.0821	3.14387	11.9491	15.4545	16.9484	56.9378	48.8037	13.0504	12.8722	16.399	8.48459	14.1498	down
AT2G40320	35.1254	31.4227	55.6119	26.7229	27.1569	30.909	44.6822	24.4019	31.9748	36.2512	9.90166	16.399	9.33305	12.1284	down
AT5G60020	38.7097	32.8193	35.6912	26.7229	14.1216	30.909	38.5192	18.9793	18.5117	17.4006	9.90166	10.0216	12.7269	9.43323	down
AT3G19620	44.4444	37.0089	51.4617	45.5861	34.7609	26.7878	58.5491	33.8916	47.1208	34.8012	8.91149	21.8653	6.78767	14.8236	down
AT5G07080	41.5771	25.1382	29.881	15.7193	55.4002	56.6664	18.4892	29.8246	35.3406	29.001	3.96066	15.4879	13.5753	5.39042	down
AT1G63300	19.3548	25.8364	24.0708	18.8632	18.4667	14.4242	18.4892	23.0463	21.8775	14.5005	4.95083	9.11054	4.2423	9.43323	down
AT2G39700	188.53	118.01	130.314	150.906	123.836	99.939	138.669	132.855	119.485	118.904	51.4886	60.1296	30.5445	33.6901	down
AT5G60490	32.9749	34.9141	74.7025	61.3054	34.7609	41.2119	52.3861	33.8916	42.0721	62.3521	13.8623	15.4879	10.1815	18.1927	down
AT3G62020	81.0036	74.0179	78.8526	88.0283	81.4708	69.03	67.7937	48.8039	48.8037	53.6518	24.7542	30.9758	16.1207	23.5831	down
AT2G38320	31.5412	27.9313	33.2011	37.7264	42.3648	35.0302	24.6523	47.4482	35.3406	30.451	3.96066	12.7548	11.03	10.107	down
AT4G28780	27.957	55.1643	88.813	14.1474	42.3648	49.4543	41.6007	42.0255	63.9496	33.3511	10.8918	20.0432	23.7569	16.8451	down
AT5G50150	57.3477	45.3883	71.3824	45.5861	48.8825	63.8785	50.8453	43.3812	31.9748	52.2018	26.7345	14.5769	4.2423	27.6259	down
AT1G04250	400.717	351.934	254.818	180.772	152.079	194.726	187.974	364.673	513.28	295.81	69.3116	134.836	100.118	120.611	down
AT1G22710	155.556	80.3024	54.7818	78.5967	63.0041	59.7573	69.3345	47.4482	65.6325	79.7527	34.6558	32.7979	25.4538	30.3211	down
AT1G15060	43.0107	26.5347	14.1105	3.14387	7.60394	9.27269	9.2446	14.9123	10.0973	17.4006	8.91149	8.19949	11.8784	6.73802	down
AT1G76410	30.8244	20.2502	21.5807	6.28773	11.9491	9.27269	4.6223	10.8453	6.73154	14.5005	7.92133	9.11054	2.54538	11.4546	down
AT2G44300	60.9319	52.3711	97.9433	59.7335	46.7099	47.3937	49.3045	33.8916	68.9983	50.7517	17.823	33.709	14.4238	24.9307	down
AT2G27740	31.5412	41.8969	68.0623	53.4457	36.9334	21.6363	47.7638	20.3349	25.2433	39.1513	14.8525	26.4206	5.09075	14.8236	down
AT3G11000	18.638	28.6296	14.9405	11.0035	10.8628	8.24239	12.3261	9.48964	13.4631	13.0504	6.93116	8.19949	5.93921	6.06422	down
AT5G46730	979.928	1007.62	1499.86	1213.53	949.407	941.693	1197.18	688.677	939.05	1194.84	261.404	499.258	315.627	447.405	down
AT5G39250	45.1613	37.0089	37.3512	11.0035	10.8628	16.4848	12.3261	21.6906	20.1946	34.8012	11.882	9.11054	16.9692	14.8236	down
AT1G71930	40.1434	34.2158	29.051	18.8632	53.2276	32.9696	41.6007	31.1802	55.5352	31.9011	11.882	14.5769	9.33305	10.7808	down
AT3G59690	18.638	15.3622	29.051	4.7158	11.9491	5.15149	4.6223	18.9793	13.4631	15.9505	6.93116	7.28843	6.78767	7.41182	down
AT5G01360	21.5054	20.9485	22.4107	15.7193	20.6393	14.4242	10.7854	14.9123	16.8289	10.1503	6.93116	7.28843	4.2423	10.7808	down
AT2G28315	60.215	60.7505	83.8328	75.4528	52.1413	53.5755	49.3045	51.5152	63.9496	52.2018	19.8033	34.62	11.03	26.9521	down
AT2G31110	107.527	166.191	217.467	116.323	110.8	112.303	89.3645	149.123	139.679	158.055	51.4886	66.5069	44.9683	59.9684	down
AT4G26140	93.1899	71.2248	63.0821	45.5861	92.3336	43.2725	24.6523	59.6492	55.5352	68.1523	31.6853	25.5095	19.5146	26.9521	down
AT3G25290	46.595	26.5347	51.4617	45.5861	16.2942	22.6666	26.193	14.9123	30.2919	20.3007	19.8033	11.8437	7.63613	17.5189	down
AT5G16490	60.215	65.6385	98.7733	91.1721	60.8316	70.0603	80.1199	43.3812	65.6325	66.7022	16.8328	42.8195	18.6661	24.2569	down
AT1G75280	719.713	569.1	815.087	636.633	568.123	573.876	619.388	589.713	706.812	777.226	252.492	291.537	182.419	243.243	down
AT2G20190	25.8064	91.4749	48.1416	17.2913	31.5021	32.9696	20.03	35.2472	58.901	24.6508	13.8623	24.5985	16.1207	22.2355	down
AT5G12870	40.8602	46.0866	45.6515	39.2983	42.3648	27.8181	60.0899	16.268	23.5604	20.3007	15.8427	18.2211	13.5753	14.1498	down
AT1G78580	65.9498	53.0694	58.1019	56.5896	38.0197	38.1211	58.5491	31.1802	38.7064	27.5509	17.823	19.1321	22.0599	23.5831	down
AT5G44005	25.0896	33.5175	31.5411	39.2983	38.0197	42.2422	46.223	29.8246	20.1946	23.2008	8.91149	11.8437	11.8784	9.43323	down
AT1G77510	193.548	221.355	232.408	136.758	56.4864	75.2118	106.313	112.52	191.849	114.554	47.528	62.8627	98.4213	93.6585	down
AT3G25710	41.5771	50.9746	58.1019	77.0247	40.1923	35.0302	72.416	42.0255	67.3154	56.5519	10.8918	33.709	15.2723	11.4546	down
AT4G30460	44.4444	33.5175	35.6912	22.0071	23.8981	20.606	35.4376	27.1133	23.5604	42.0514	15.8427	13.6658	9.33305	15.4974	down
AT1G50640	391.398	507.651	144.425	127.327	131.44	140.121	120.18	246.731	272.627	94.2532	121.79	106.593	132.36	142.172	down
AT2G28760	55.914	52.3711	83.0028	66.0212	41.2786	59.7573	64.7122	43.3812	42.0721	49.3017	19.8033	34.62	20.363	17.5189	down
AT4G29100	60.215	37.0089	48.1416	59.7335	68.4355	47.3937	26.193	67.7831	35.3406	36.2512	12.8722	34.62	11.03	12.1284	down
AT5G45970	30.1075	29.3278	48.1416	58.1615	21.7256	26.7878	30.8153	20.3349	18.5117	31.9011	9.90166	22.7763	10.1815	9.43323	down
AT1G11190	63.0824	52.3711	58.932	62.8773	77.1257	53.5755	40.0599	98.9634	74.047	95.7032	9.90166	23.6874	18.6661	33.6901	down
AT5G22580	162.007	101.949	153.555	64.4493	80.3846	148.363	107.854	79.9841	65.6325	79.7527	28.7148	69.2401	29.6961	78.8348	down
AT5G44030	31.5412	30.0261	41.5014	48.7299	32.5883	22.6666	40.0599	28.4689	37.0235	40.6014	15.8427	7.28843	11.8784	16.1712	down
AT4G34050	1244.44	996.448	1287.37	1050.05	1285.07	1202.36	1063.13	1050.64	1149.41	1332.59	485.181	505.635	321.566	446.057	down
AT3G14990	55.914	40.5004	61.422	53.4457	52.1413	77.2724	80.1199	33.8916	25.2433	40.6014	22.7738	29.1537	12.7269	14.1498	down
AT3G13310	112.545	48.8797	55.6119	23.579	24.9844	20.606	38.5192	20.3349	28.6091	30.451	36.6361	19.1321	23.7569	28.9735	down
AT3G61820	107.527	159.208	141.935	99.0318	92.3336	130.848	110.935	89.4737	136.314	116.004	44.5575	56.4853	53.4529	49.8613	down
AT2G45660	42.2939	39.1038	24.0708	6.28773	27.1569	19.5757	20.03	28.4689	20.1946	26.1009	10.8918	10.9326	12.7269	18.1927	down
AT4G16447	27.957	36.3107	51.4617	31.4387	23.8981	26.7878	32.3561	27.1133	30.2919	30.451	9.90166	20.9542	17.8176	9.43323	down
AT5G50160	29.3907	41.8969	48.9716	28.2948	49.9688	50.4846	40.0599	52.8708	25.2433	31.9011	12.8722	20.9542	12.7269	14.1498	down
AT5G24870	32.2581	42.5952	20.7507	15.7193	27.1569	17.5151	27.7338	23.0463	20.1946	26.1009	13.8623	10.0216	14.4238	10.107	down
AT4G30450	101.792	53.0694	80.5127	37.7264	56.4864	53.5755	57.0084	33.8916	30.2919	84.1028	25.7443	36.4422	27.1507	30.3211	down
AT2G28470	58.0645	81.0007	68.0623	42.4422	56.4864	55.6361	18.4892	47.4482	48.8037	39.1513	22.7738	23.6874	25.4538	33.6901	down
AT4G38620	255.914	286.994	317.071	161.909	161.855	135.999	215.707	165.391	168.289	92.8031	71.292	60.1296	184.964	122.632	down
AT1G21670	37.9928	40.5004	37.3512	23.579	8.69022	7.21209	10.7854	28.4689	45.4379	7.25024	12.8722	20.0432	8.48459	18.1927	down
AT5G26330	65.233	81.0007	124.504	152.478	68.4355	74.1815	106.313	71.8501	94.2416	69.6023	24.7542	49.1969	22.9084	42.4495	down
AT4G30980	73.1183	51.6729	64.7422	47.158	47.7962	50.4846	50.8453	33.8916	42.0721	50.7517	18.8132	22.7763	25.4538	31.6687	down
AT2G03730	53.0466	46.0866	34.8612	26.7229	17.3804	26.7878	40.0599	17.6236	35.3406	27.5509	15.8427	21.8653	16.1207	16.1712	down
AT4G12910	81.0036	65.6385	75.5325	73.8809	77.1257	69.03	49.3045	70.4945	74.047	69.6023	37.6263	31.8869	20.363	26.2783	down
AT1G62480	231.541	77.5093	140.275	127.327	203.134	183.393	198.759	177.592	114.436	130.504	38.6165	76.5285	58.5437	63.3374	down
AT1G70670	143.369	162.7	137.785	83.3125	246.585	196.787	106.313	219.617	180.069	247.958	39.6066	66.5069	45.8168	84.2253	down
AT3G56240	286.021	217.864	268.099	394.555	486.652	419.332	320.48	454.147	286.091	421.964	137.633	123.903	61.9375	88.9419	down
AT5G54470	37.9928	48.1815	28.2209	12.5755	20.6393	23.6969	13.8669	24.4019	13.4631	18.8506	14.8525	17.31	8.48459	20.8879	down
AT1G78120	25.0896	23.7416	25.7309	28.2948	19.553	15.4545	30.8153	25.7576	30.2919	21.7507	8.91149	13.6658	11.03	6.73802	down
AT3G52370	86.7383	60.7505	82.1727	99.0318	65.1767	56.6664	66.253	89.4737	74.047	95.7032	28.7148	32.7979	27.1507	35.7115	down
AT3G43690	41.5771	73.3196	88.813	56.5896	34.7609	37.0908	52.3861	75.9171	94.2416	53.6518	24.7542	33.709	25.4538	26.9521	down
AT1G75040	172.76	137.562	132.804	224.786	68.4355	84.4845	130.965	104.386	203.629	114.554	51.4886	71.9733	41.5745	76.8134	down
AT2G28870	83.871	92.1732	101.263	66.0212	52.1413	69.03	58.5491	81.3398	80.7785	69.6023	17.823	41.9085	51.756	41.1019	down
AT1G53640	21.5054	30.0261	30.711	15.7193	18.4667	10.303	12.3261	13.5566	15.146	11.6004	11.882	7.28843	12.7269	13.476	down
AT4G01070	113.262	73.3196	81.3427	45.5861	68.4355	67.9997	73.9568	50.1595	50.4866	84.1028	37.6263	38.2643	33.9384	38.4067	down
AT1G28400	182.796	108.932	161.855	149.334	109.714	146.302	134.047	108.453	132.948	123.254	60.4001	78.3506	41.5745	70.7492	down
AT3G44720	114.695	65.6385	119.524	51.8738	90.1611	73.1512	38.5192	71.8501	68.9983	104.404	33.6656	62.8627	34.7868	35.0377	down
AT5G44480	177.061	189.933	183.436	97.4599	86.9022	42.2422	93.9868	178.947	220.458	134.855	86.1444	69.2401	59.3921	91.6371	down
AT3G10740	187.814	145.243	126.994	80.1686	182.495	140.121	80.1199	180.303	131.265	136.305	61.3903	69.2401	72.119	54.578	down
AT3G53620	268.1	276.52	369.362	440.141	249.844	254.484	403.681	256.22	309.651	245.058	109.908	187.677	90.7851	123.98	down
AT3G45210	53.0466	43.2935	63.9121	26.7229	40.1923	24.7272	49.3045	31.1802	33.6577	33.3511	15.8427	16.399	22.9084	35.0377	down
AT2G40890	32.9749	26.5347	38.1813	34.5825	32.5883	37.0908	13.8669	25.7576	33.6577	27.5509	16.8328	9.11054	11.03	18.1927	down
AT1G03430	53.7634	87.2852	58.932	55.0177	49.9688	53.5755	72.416	44.7369	23.5604	17.4006	19.8033	30.9758	33.9384	28.2997	down
AT2G23790	195.699	129.88	98.7733	99.0318	65.1767	70.0603	75.4976	75.9171	104.339	97.1533	63.3706	47.3748	64.4829	66.7064	down
AT4G38060	60.215	43.9918	37.3512	22.0071	26.0707	17.5151	16.9484	39.3142	30.2919	33.3511	22.7738	18.2211	24.6053	16.8451	down
AT3G20870	169.176	168.286	63.0821	58.1615	55.4002	49.4543	38.5192	117.943	127.899	29.001	53.469	61.0406	61.9375	57.2732	down
AT3G14560	322.581	335.175	347.782	231.074	135.785	113.333	149.454	115.231	185.117	197.207	116.84	118.437	157.813	196.75	down
AT5G19730	73.1183	76.1127	103.753	84.8844	63.0041	47.3937	95.5275	39.3142	35.3406	43.5015	33.6656	26.4206	42.423	46.4923	down
AT5G26220	37.9928	23.0433	43.9915	64.4493	58.659	37.0908	36.9784	33.8916	25.2433	87.0029	16.8328	15.4879	12.7269	16.8451	down
AT5G59810	307.527	371.486	300.47	275.088	168.373	221.514	217.248	272.488	402.21	276.959	136.643	129.37	150.177	163.06	down
AT1G12080	191.398	195.519	308.77	243.65	181.408	216.363	342.05	112.52	264.213	198.657	44.5575	150.324	84.8459	141.498	down
AT5G24120	209.319	125.691	129.484	59.7335	41.2786	25.7575	30.8153	20.3349	65.6325	31.9011	102.977	49.1969	57.6952	74.792	down
AT2G30040	91.7563	97.0612	63.0821	50.3019	58.659	49.4543	64.7122	20.3349	40.3892	42.0514	43.5673	51.019	26.3022	34.3639	down
AT5G63800	83.871	69.8282	68.8923	47.158	120.577	92.7269	55.4676	92.1851	75.7298	73.9525	31.6853	39.1753	39.0291	28.2997	down
AT3G20760	45.8781	46.0866	45.6515	23.579	22.8118	9.27269	9.2446	32.5359	21.8775	49.3017	10.8918	28.2427	25.4538	20.8879	down
AT3G47500	95.3405	78.9059	63.9121	42.4422	47.7962	57.6967	70.8753	47.4482	33.6577	43.5015	29.705	26.4206	57.6952	34.3639	down
AT4G32950	58.0645	89.3801	84.6628	34.5825	24.9844	31.9393	38.5192	56.9378	42.0721	49.3017	30.6951	30.9758	49.2106	33.6901	down
AT1G15100	94.6236	155.019	127.824	144.618	83.6434	110.242	146.373	71.8501	114.436	105.854	42.5771	49.1969	84.8459	58.6208	down
AT1G06080	101.075	138.958	151.065	53.4457	53.2276	58.727	53.9268	55.5822	149.777	58.002	59.41	52.8411	63.6344	68.054	down
AT1G01010	101.792	75.4145	42.3314	45.5861	35.8472	69.03	24.6523	74.5614	80.7785	76.8526	25.7443	42.8195	32.2414	36.3853	down
AT2G04160	64.5161	50.9746	41.5014	40.8703	59.7453	23.6969	52.3861	74.5614	117.802	72.5024	32.6755	24.5985	17.8176	23.5831	down
AT1G32300	81.0036	136.863	103.753	67.5931	77.1257	92.7269	66.253	126.077	153.143	87.0029	48.5181	66.5069	41.5745	45.8185	down
AT2G37040	886.738	796.74	776.076	614.626	731.065	761.391	733.405	519.219	703.446	607.57	434.683	405.419	366.534	370.591	down
AT3G29030	363.441	451.09	487.226	355.257	281.346	299.817	346.673	322.648	408.941	314.661	190.112	259.65	184.116	201.467	down
AT4G36890	55.1971	64.9402	73.0424	83.3125	44.5374	33.9999	50.8453	55.5822	47.1208	46.4016	32.6755	30.0648	25.4538	36.3853	down
AT3G50760	243.011	175.269	131.144	144.618	99.9376	105.09	152.536	109.809	104.339	107.304	79.2133	75.6175	78.9067	122.632	down
AT4G15320	46.595	46.7849	37.3512	37.7264	31.5021	22.6666	40.0599	37.9586	50.4866	37.7013	18.8132	17.31	22.9084	26.2783	down
AT4G23400	220.072	209.485	275.569	226.358	323.711	301.878	228.033	258.932	286.091	250.858	103.967	146.68	103.512	107.808	down
AT2G36880	490.322	463.659	572.719	476.296	458.409	464.665	516.157	431.101	521.694	482.866	228.728	311.58	223.993	237.852	down
AT3G28050	164.875	259.761	170.986	138.33	158.597	130.848	129.424	124.721	195.215	124.704	85.1543	108.415	102.664	96.3537	down
AT2G34650	74.552	88.6818	89.643	64.4493	51.0551	54.6058	58.5491	59.6492	67.3154	33.3511	38.6165	34.62	50.0591	43.7971	down
AT5G04860	58.0645	56.5608	58.932	36.1545	27.1569	31.9393	32.3561	46.0925	38.7064	17.4006	36.6361	17.31	30.5445	30.3211	down
AT5G64260	384.946	387.546	218.297	234.218	278.087	226.666	183.351	406.699	244.018	445.165	211.896	189.499	106.906	149.584	down
AT4G24780	439.426	320.511	195.056	182.344	174.891	239.029	244.982	162.68	191.849	163.856	145.554	174.011	155.268	159.691	down
AT4G30180	166.308	108.932	107.904	34.5825	32.5883	23.6969	40.0599	39.3142	58.901	59.452	68.3215	37.3532	65.3314	84.2253	down
AT1G69760	61.6487	71.2248	93.7931	39.2983	46.7099	30.909	20.03	39.3142	53.8523	46.4016	28.7148	35.5311	42.423	45.8185	down
AT2G35120	98.2079	81.699	118.694	97.4599	84.7297	105.09	90.9052	61.0048	117.802	89.903	36.6361	58.3075	39.8776	68.054	down
AT1G52760	156.989	113.122	164.345	155.621	179.236	172.06	175.647	174.88	143.045	143.555	69.3116	96.5717	69.5737	59.9684	down
AT1G32700	122.581	92.1732	91.303	102.176	129.267	116.424	73.9568	103.03	43.755	102.953	52.4788	46.4638	66.1798	44.4709	down
AT2G04780	139.785	120.803	151.065	110.035	120.577	131.878	103.231	131.499	122.851	133.404	54.4591	81.0838	56.8468	90.2895	down
AT5G48930	244.444	207.39	198.377	179.2	207.479	234.908	244.982	168.102	198.58	208.807	126.741	112.971	111.148	97.7013	down
AT1G64340	372.76	285.597	194.226	113.179	111.887	97.8784	140.21	159.968	146.411	171.106	181.2	111.149	127.269	172.493	down
AT5G20670	96.0573	71.923	105.414	40.8703	42.3648	27.8181	43.1415	75.9171	111.07	75.4025	54.4591	38.2643	37.3322	60.6422	down
AT4G22920	96.7742	68.4316	69.7223	64.4493	89.0748	69.03	47.7638	90.8294	65.6325	102.953	31.6853	43.7306	42.423	46.4923	down
AT5G01600	1303.23	837.938	541.178	836.268	896.179	902.542	987.632	925.918	878.466	959.932	489.142	484.681	336.838	580.144	down
AT4G14440	118.996	221.355	208.337	246.794	183.581	231.817	244.982	135.566	169.971	92.8031	88.1248	95.6607	94.179	109.156	down
AT2G28370	63.7993	90.0784	70.5524	29.8667	33.6746	37.0908	36.9784	75.9171	57.2181	62.3521	34.6558	38.2643	45.8168	39.7543	down
AT3G18280	421.505	281.408	424.144	386.696	337.832	299.817	358.999	425.678	402.21	522.018	186.151	269.672	116.239	224.376	down
AT3G52470	123.297	196.916	183.436	165.053	130.353	143.212	146.373	184.37	186.8	195.757	101.987	97.4828	61.9375	96.3537	down
AT4G02940	105.376	120.104	96.2832	59.7335	51.0551	40.1816	43.1415	50.1595	63.9496	68.1523	88.1248	42.8195	38.1807	61.316	down
AT1G45145	165.591	134.07	169.326	205.923	202.048	187.514	184.892	147.767	134.631	200.107	103.967	99.3049	47.5137	85.5729	down
AT3G23000	83.1541	65.6385	81.3427	31.4387	36.9334	48.424	32.3561	51.5152	37.0235	27.5509	41.587	35.5311	44.9683	43.1233	down
AT2G21320	182.079	183.648	194.226	70.737	97.765	79.333	72.416	46.0925	85.8272	73.9525	118.82	86.5501	78.0582	119.263	down
AT4G34990	249.462	316.322	261.459	279.804	196.616	209.151	300.45	299.601	262.53	258.109	106.938	98.3938	202.782	187.317	down
AT5G03240	180.645	142.45	119.524	94.316	160.769	214.302	138.669	165.391	114.436	108.754	76.2428	58.3075	91.6336	97.0275	down
AT3G03780	360.573	247.89	268.929	259.369	272.656	269.938	217.248	281.978	314.7	301.61	169.318	172.189	144.238	156.996	down
AT4G18280	94.6236	71.923	63.9121	72.3089	85.8159	74.1815	75.4976	58.2935	60.5839	84.1028	38.6165	40.9974	37.3322	51.8828	down
AT5G19900	101.792	118.708	97.9433	100.604	76.0394	77.2724	95.5275	82.6954	95.9245	120.354	51.4886	71.9733	56.8468	54.578	down
AT2G38120	98.2079	166.889	167.666	169.769	209.652	249.332	178.729	225.04	198.58	174.006	69.3116	62.8627	107.754	79.5086	down
AT1G68560	387.097	435.728	529.558	306.527	306.33	334.847	294.286	326.715	371.918	327.711	196.053	245.985	260.477	301.19	down
AT2G47270	323.297	238.812	168.496	100.604	122.749	60.7876	70.8753	130.144	112.753	153.705	160.407	92.0164	138.299	152.279	down
AT2G01910	65.233	62.8454	73.8725	81.7405	57.5727	62.8482	55.4676	51.5152	57.2181	49.3017	32.6755	36.4422	39.0291	43.1233	down
AT3G21240	161.29	156.415	131.974	89.6002	121.663	125.696	109.394	97.6077	117.802	110.204	78.2231	78.3506	95.0274	86.2467	down
AT2G35860	92.4731	97.7595	116.204	91.1721	73.8669	69.03	98.6091	77.2728	121.168	100.053	58.4198	55.5743	54.3014	61.9898	down
AT5G54160	169.892	152.225	119.524	154.049	131.44	125.696	138.669	111.164	127.899	156.605	88.1248	87.4612	67.8767	90.9633	down
AT1G66480	156.989	189.933	123.674	103.748	126.008	145.272	157.158	116.587	129.582	150.805	82.1838	79.2617	97.5728	97.7013	down
AT4G13266	565.591	644.514	595.13	613.054	409.527	467.756	523.861	504.306	693.349	468.366	350.519	297.004	313.081	408.998	down
AT5G07990	128.315	206.691	253.988	91.1721	74.9532	111.272	75.4976	115.231	171.654	113.104	146.545	102.949	105.209	92.3109	down
AT1G19300	290.323	310.037	324.541	284.52	234.636	284.362	285.042	225.04	329.846	285.66	155.456	202.254	165.45	181.927	down
AT5G11260	86.7383	84.4921	79.6827	40.8703	22.8118	40.1816	12.3261	28.4689	31.9748	58.002	53.469	45.5527	39.8776	53.9042	down
AT4G05050	1741.94	1363.74	1339.66	875.567	1048.26	1417.69	1138.63	816.109	1085.46	1084.64	801.044	980.294	672.828	967.58	down
AT5G19600	93.9068	124.294	79.6827	72.3089	81.4708	81.3936	77.0383	93.5407	106.022	98.6033	53.469	62.8627	64.4829	48.5137	down
AT1G08570	160.573	130.579	110.394	97.4599	97.765	124.666	100.15	66.4275	77.4127	81.2027	98.0264	66.5069	76.3613	72.7706	down
AT2G37170	884.588	1037.65	835.838	913.293	789.724	972.602	1012.28	753.748	908.758	923.681	495.083	553.921	587.982	517.48	down
AT5G65660	389.247	443.409	379.323	271.944	404.095	300.847	289.664	546.332	302.919	359.612	227.738	162.168	335.141	223.702	down
AT1G64390	814.337	809.309	968.642	693.223	673.492	622.3	614.766	489.394	572.181	629.321	316.853	693.312	496.349	549.149	down
AT4G39260	307.527	351.236	313.75	169.769	400.836	411.089	289.664	494.817	366.869	324.811	161.397	189.499	212.963	209.552	down
AT2G44160	174.91	157.812	205.847	133.614	165.114	161.757	163.321	170.813	185.117	153.705	113.869	114.793	105.209	95.6799	down
AT5G15490	375.627	407.797	522.087	572.184	379.111	334.847	372.866	352.472	405.575	381.363	238.63	274.227	269.81	265.478	down
AT1G06550	134.05	141.053	108.734	77.0247	103.196	99.939	103.231	84.0511	134.631	113.104	77.233	69.2401	86.5428	80.1824	down
AT2G28950	1924.73	2380.44	2493.4	1538.92	1816.26	2021.45	1821.19	1611.88	2350.99	1539.95	1348.61	1480.46	1443.23	1306.5	down
AT2G45300	192.832	178.062	180.946	193.348	159.683	191.636	201.84	170.813	173.337	165.306	116.84	105.682	110.3	125.327	down
AT1G73220	215.054	240.209	222.447	111.607	137.957	151.454	186.433	173.525	151.46	201.557	133.672	133.014	173.086	123.306	down
AT4G30960	304.659	261.157	205.017	251.509	148.82	163.817	198.759	116.587	90.8758	129.054	135.653	146.68	173.086	185.969	down
AT2G21430	212.903	259.063	219.957	282.948	185.753	225.635	240.36	183.014	277.676	305.96	131.692	166.723	143.39	136.782	down
AT3G19450	253.763	180.855	190.076	187.06	193.357	152.484	163.321	169.458	198.58	163.856	155.456	141.213	131.511	110.504	down
AT4G26850	354.122	366.598	312.92	229.502	225.946	234.908	212.626	214.195	244.018	175.456	223.778	225.03	206.176	237.852	down
AT5G65670	790.681	909.861	913.86	701.082	814.708	871.633	687.182	776.795	866.686	694.573	527.758	568.498	613.436	622.593	down
AT4G38810	665.233	727.61	675.643	754.528	563.778	589.331	660.989	551.755	626.033	651.072	530.729	408.152	546.408	373.286	down
AT4G33220	365.591	460.866	381.813	407.131	385.629	548.119	471.475	554.466	523.377	330.611	270.315	297.915	285.931	253.35	down
AT4G13930	359.14	381.96	414.184	322.246	366.076	348.241	380.569	287.4	420.721	346.562	240.61	319.78	231.629	276.259	down
AT1G70700	453.763	400.814	434.104	319.102	277.001	296.726	328.183	219.617	279.359	324.811	291.109	320.691	257.083	333.532	down
AT2G22475	221.505	247.89	255.649	249.937	186.84	165.878	224.952	273.844	286.091	274.059	191.102	169.456	166.298	154.301	down
AT5G54500	464.516	466.452	526.238	514.022	529.017	517.21	488.423	410.766	467.842	469.816	353.489	379.909	288.476	349.703	down
AT5G17920	1620.79	1585.8	1750.53	1575.08	1557.72	1737.08	1727.2	1577.99	2041.34	1602.3	1127.8	1352	1197.18	1171.07	down
AT5G63530	650.896	724.118	793.506	531.313	474.703	527.513	567.002	547.688	575.547	559.719	527.758	534.789	545.559	545.106	down
AT5G02380	7025.09	6998.18	6542.28	7567.29	7571.36	8406.21	8069	6349.92	5896.83	7325.65	9728.38	8260.53	9998.24	9547.77	up
AT1G15400	269.534	250.683	249.008	281.376	286.777	305.999	283.501	287.4	291.139	303.06	371.312	349.845	388.594	347.008	up
AT5G56750	705.376	671.049	611.73	872.423	733.237	552.24	540.809	494.817	422.404	672.823	924.815	853.658	976.576	1046.41	up
AT2G37220	244.444	223.45	278.059	213.783	255.275	291.575	232.656	295.534	238.97	262.459	381.214	369.888	341.929	349.703	up
AT4G17170	232.258	282.804	294.66	328.534	357.385	329.696	340.509	412.121	385.381	375.563	397.057	392.664	421.684	365.201	up
AT1G75350	296.774	287.692	378.493	289.236	278.087	341.029	268.093	340.271	307.968	349.462	457.457	474.659	476.834	495.244	up
AT5G20230	1857.35	2132.55	1776.26	2540.24	2525.6	2542.78	2725.62	2300.56	2600.06	2162.02	2944.75	2897.15	2562.35	3029.41	up
AT3G43720	1201.43	1648.64	1718.99	2222.71	2177.99	2039.99	2231.03	1839.63	2172.61	1863.31	2168.46	2228.44	2356.17	2311.14	up
AT1G67090	12663.1	9310.89	14244.9	9779	11828.5	12813.8	11526.5	13133.7	11733.1	13536.2	19395.4	17813.8	18496.4	16200.9	up
AT1G60950	1105.38	902.879	1128.01	839.412	826.657	911.814	853.585	850	969.342	1036.78	1607.04	1431.27	1578.13	1630.6	up
AT5G20270	233.692	251.382	271.419	372.548	353.04	337.938	326.643	296.89	366.869	292.91	422.801	376.265	363.989	347.008	up
AT5G43760	236.559	277.916	293.83	479.44	414.958	417.271	465.312	391.786	412.307	301.61	434.683	368.977	397.079	413.041	up
AT4G38970	693.19	562.117	776.076	594.191	595.28	631.573	637.877	744.259	649.594	764.176	1130.77	989.405	974.88	972.296	up
AT5G66570	1302.51	1089.32	1320.57	1051.62	1300.27	1435.21	1189.47	1348.88	1416.99	1428.3	1972.41	1834.86	1986.24	1681.81	up
AT5G65380	363.441	492.289	447.385	501.447	347.609	315.271	443.741	334.849	467.842	377.013	634.696	573.964	682.161	743.204	up
AT4G01150	972.76	698.98	1045.83	745.096	833.175	965.39	878.237	962.52	853.223	1075.94	1480.3	1296.43	1444.08	1277.53	up
AT2G19460	258.781	315.623	351.932	413.418	393.233	339.999	374.406	268.421	405.575	305.96	481.221	396.308	499.742	506.699	up
AT5G59320	2337.63	1596.27	2080.88	1556.21	1640.28	1714.42	1707.17	2198.88	1312.65	1828.51	3594.3	2732.25	2869.49	3060.41	up
AT5G61410	289.606	245.097	256.479	248.365	250.93	243.15	248.063	296.89	240.653	262.459	471.319	338.912	433.563	375.308	up
AT1G05190	164.158	145.243	200.867	125.755	168.373	189.575	189.514	214.195	193.532	152.255	267.345	264.206	248.599	265.478	up
AT1G06400	216.487	215.071	268.929	267.229	279.173	226.666	217.248	272.488	255.799	272.609	406.958	373.532	324.96	330.163	up
AT1G52220	157.706	158.51	202.527	119.467	199.875	190.605	180.27	150.479	154.825	210.257	246.551	267.85	290.173	259.414	up
AT2G38540	16893.9	20406.6	25321.7	34903.2	24163.2	27008.2	35804.3	16602.8	26003.9	17474.5	32398.2	30081.2	29841.2	36189.9	up
AT5G26742	115.412	109.63	122.844	105.32	127.094	132.909	117.098	130.144	137.997	166.756	185.161	191.321	166.298	171.146	up
AT3G14415	147.67	122.898	143.595	117.895	142.302	125.696	130.965	173.525	131.265	147.905	230.709	189.499	225.69	204.162	up
AT3G23050	1222.94	1149.37	1084.85	1543.64	1583.79	1426.96	1705.63	1228.23	1374.92	1302.14	1818.93	1723.71	1873.4	1744.47	up
AT3G54210	210.036	186.441	233.238	213.783	235.722	254.484	229.574	220.973	185.117	265.359	336.656	297.915	328.354	341.618	up
AT1G10360	109.677	89.3801	86.3229	111.607	95.5924	108.181	98.6091	65.0718	94.2416	89.903	151.495	146.68	150.177	145.541	up
AT5G14920	542.652	910.56	776.076	1178.95	1250.31	1500.11	1308.11	868.98	1280.68	916.431	1181.27	1178.9	1052.94	1231.04	up
AT4G03280	577.061	508.349	607.58	462.148	598.539	545.028	503.831	608.692	573.864	717.774	942.638	834.525	909.548	848.991	up
AT4G24770	215.771	162.001	208.337	199.636	180.322	218.423	198.759	237.241	215.409	204.457	317.843	292.448	280.84	337.575	up
AT1G67740	371.326	312.132	476.436	394.555	423.648	464.665	357.458	387.719	382.015	427.764	642.618	584.897	640.587	563.972	up
AT3G15360	129.032	124.992	143.595	103.748	145.561	173.09	166.403	150.479	136.314	143.555	226.748	192.232	241.811	174.515	up
AT1G12900	424.373	402.21	590.98	402.415	447.546	474.968	509.994	464.992	466.159	542.318	704.998	731.576	846.762	694.69	up
AT2G47400	845.161	777.886	890.62	757.672	1029.79	995.269	775.006	896.093	774.127	864.229	1310.98	1202.59	1444.93	1346.93	up
AT1G08520	115.412	127.087	144.425	152.478	132.526	148.363	112.476	151.834	143.045	163.856	210.905	198.61	191.752	216.964	up
AT3G55800	258.781	226.243	289.68	213.783	168.373	177.211	232.656	211.483	277.676	243.608	457.457	351.667	414.897	417.757	up
AT1G60010	122.581	150.829	117.034	160.337	164.028	162.787	147.914	138.278	117.802	134.855	229.719	194.054	212.963	191.36	up
AT4G35100	1687.45	1367.24	1306.46	1777.86	1782.58	1740.17	1938.28	1541.39	1573.5	1777.76	2233.81	2421.58	2371.44	2275.43	up
AT2G39730	1201.43	900.085	1200.22	828.409	929.854	933.451	958.357	942.185	1085.46	1186.14	2083.31	1623.5	1808.07	1555.14	up
AT4G01310	131.9	94.2681	149.405	155.621	139.044	162.787	158.699	142.345	176.703	139.205	188.132	227.763	191.752	200.119	up
AT3G62030	329.032	231.131	428.294	264.085	306.33	346.18	303.531	338.916	355.089	305.96	553.503	534.789	538.772	506.025	up
AT1G09340	194.982	143.846	194.226	155.621	139.044	156.605	178.729	178.947	183.435	174.006	324.774	285.16	275.749	266.152	up
AT4G09890	202.15	273.727	209.167	196.492	249.844	182.363	163.321	159.968	203.629	255.209	423.791	398.131	328.354	330.837	up
AT3G14420	266.667	214.373	271.419	207.495	263.965	255.514	232.656	291.467	247.384	361.062	482.211	363.511	398.776	384.741	up
AT1G20823	347.67	296.072	253.158	517.166	315.021	394.604	519.238	197.927	309.651	247.958	547.562	458.26	404.715	531.63	up
AT2G01850	146.237	182.252	175.966	171.341	218.342	217.393	154.077	204.705	257.481	198.657	338.637	264.206	263.022	229.093	up
ATCG00930	206.452	146.639	249.008	187.06	208.565	266.847	258.849	235.885	249.067	261.009	310.912	330.713	331.748	338.922	up
AT1G14740	91.7563	123.596	103.753	124.183	110.8	123.636	121.721	101.675	122.851	140.655	170.309	215.009	154.42	156.322	up
ATCG00180	100.358	77.5093	115.374	88.0283	99.9376	87.5754	78.5791	81.3398	109.388	100.053	151.495	150.324	151.026	187.991	up
AT3G50685	179.211	139.656	216.637	177.628	167.287	180.302	209.544	154.546	137.997	207.357	309.922	237.785	341.081	282.323	up
AT5G57800	240.86	252.08	294.66	344.253	389.974	375.029	366.703	334.849	339.943	284.21	465.378	409.063	439.502	408.998	up
AT1G21830	71.6846	67.0351	77.1926	146.19	99.9376	105.09	106.313	78.6284	85.8272	111.654	129.712	93.8386	125.572	123.98	up
AT5G28500	58.7813	58.6557	69.7223	37.7264	58.659	57.6967	32.3561	78.6284	68.9983	62.3521	112.879	98.3938	101.815	97.7013	up
AT5G35630	582.079	450.392	673.152	510.878	507.292	587.27	605.521	633.094	562.084	640.922	1048.59	860.035	956.213	886.723	up
AT1G06680	1143.37	981.784	1323.89	1017.04	1335.04	1434.18	1198.72	1361.09	1220.09	1467.45	1974.39	1821.2	2118.6	1679.79	up
ATCG01200	204.301	147.337	239.048	183.916	204.22	258.605	258.849	234.53	249.067	258.109	308.932	327.979	325.808	339.596	up
AT5G23060	83.1541	80.3024	107.074	91.1721	98.8513	99.939	140.21	107.097	95.9245	114.554	153.476	143.947	145.935	154.301	up
ATCG00950	8093.19	6692.33	8034.67	6510.95	7074.93	5408.04	4737.86	9172.41	6824.1	11622.1	13073.2	10914.4	13138.4	13291.4	up
ATCG01180	8091.04	6690.24	8028.03	6509.38	7076.01	5409.07	4734.78	9171.06	6820.73	11625	13070.2	10914.4	13136.7	13289.4	up
AT1G20340	1947.67	1431.48	2177.99	1428.89	2033.51	2242.96	1973.72	2236.84	1950.46	2343.28	3082.39	2904.44	3426.93	2880.5	up
AT5G47190	202.15	138.958	200.037	133.614	182.495	244.181	175.647	220.973	237.287	205.907	299.03	323.424	265.568	310.623	up
AT3G25690	101.075	87.2852	90.473	103.748	91.2473	100.969	121.721	96.252	109.388	136.305	165.358	147.591	166.298	139.477	up
AT3G26060	324.014	240.907	341.971	238.934	256.362	299.817	243.441	318.581	302.919	307.41	556.473	463.726	525.196	474.357	up
AT3G05220	91.7563	93.5698	78.8526	114.751	180.322	127.757	120.18	165.391	106.022	127.604	139.613	163.99	151.874	133.413	up
AT3G16570	75.9856	55.1643	87.9829	80.1686	94.5062	88.6057	81.6606	75.9171	89.1929	108.754	128.722	125.725	106.906	127.349	up
AT3G11780	231.541	270.235	270.589	361.545	433.425	366.786	494.586	432.456	329.846	394.413	418.84	403.597	475.137	435.95	up
AT2G30570	1488.17	1238.05	1672.51	1163.23	1652.23	1738.11	1500.71	1701.36	1312.65	1837.21	2613.05	2300.41	2790.58	2175.71	up
AT1G64720	241.577	158.51	197.547	168.197	261.793	233.878	192.596	241.308	227.19	242.158	397.057	310.669	346.171	296.473	up
ATCG01020	1064.52	878.439	1340.49	624.057	923.336	555.331	448.363	1007.26	888.563	1618.25	1653.58	1786.58	2066	1929.77	up
AT5G04140	78.1362	64.9402	64.7422	72.3089	73.8669	70.0603	63.1714	78.6284	114.436	82.6528	143.574	103.86	113.694	110.504	up
AT3G09390	6474.55	4763.68	5653.32	4667.07	5392.28	5248.34	5697.76	5677.51	3922.81	6364.26	10434.4	7742.14	10271.4	9954.08	up
AT5G64040	963.441	767.412	1150.42	730.949	951.579	1040.6	966.061	1041.15	912.124	1265.89	1659.52	1463.15	1808.91	1621.17	up
AT2G13360	244.444	151.527	204.187	133.614	130.353	121.575	134.047	165.391	193.532	232.008	395.076	302.47	368.231	299.168	up
ATCG01210	923.297	593.54	708.014	774.963	835.348	872.663	748.813	970.654	817.882	1083.19	1373.36	1081.42	1250.63	1358.38	up
ATCG00920	924.731	593.54	708.014	774.963	837.52	870.602	745.731	972.01	817.882	1087.54	1374.35	1083.24	1251.48	1359.73	up
AT1G44970	900.358	939.189	727.934	1144.37	896.179	1146.72	1301.95	592.425	902.027	711.974	1169.39	1424.89	1622.25	1642.73	up
AT3G17185	244.444	212.976	265.609	163.481	180.322	112.303	118.639	155.901	173.337	220.407	423.791	323.424	492.955	413.041	up
AT5G43270	83.1541	85.1904	125.334	150.906	85.8159	84.4845	118.639	128.788	134.631	123.254	174.269	164.901	155.268	177.21	up
AT1G14290	68.1003	87.9835	108.734	122.611	127.094	115.393	90.9052	88.1181	122.851	97.1533	164.368	155.79	133.208	152.953	up
AT1G30380	1076.7	881.232	1070.74	861.419	1163.4	1176.6	1123.22	1142.82	947.464	1367.4	1770.42	1611.65	1997.27	1559.18	up
AT4G12800	1200	937.793	1078.21	845.7	1229.67	1329.09	1064.67	1266.19	1013.1	1277.49	1996.17	1735.56	2044.79	1596.91	up
AT3G26650	1134.77	853.999	1238.4	902.29	1049.34	1036.48	962.979	1100.8	1063.58	1151.34	2250.65	1591.61	2011.7	1578.72	up
AT3G12620	44.4444	52.3711	46.4815	75.4528	69.5218	71.0906	80.1199	77.2728	53.8523	60.902	85.1543	74.7064	91.6336	79.5086	up
AT2G33800	240.86	209.485	346.952	322.246	279.173	364.726	298.909	352.472	319.748	287.11	416.86	500.169	455.623	473.683	up
AT4G05180	360.573	256.269	380.153	246.794	404.095	430.665	303.531	486.683	341.626	487.216	579.247	527.5	651.617	554.539	up
AT1G20310	180.645	256.968	147.745	270.373	297.64	338.968	314.316	231.818	218.775	272.609	408.939	346.2	324.96	278.28	up
AT1G20020	209.319	198.312	201.697	157.193	192.271	244.181	175.647	234.53	181.752	192.856	406.958	317.047	376.716	315.339	up
AT4G28080	99.6416	92.8715	128.654	50.3019	76.0394	90.6663	64.7122	79.9841	94.2416	162.405	211.896	177.656	181.57	175.862	up
AT2G15970	165.591	169.683	163.515	303.383	385.629	263.756	309.694	260.287	159.874	400.213	326.755	248.718	289.325	298.494	up
AT5G01530	858.064	624.264	880.659	602.05	915.732	845.875	756.517	1016.75	799.371	996.183	1452.57	1305.54	1589.16	1171.07	up
AT1G27290	87.4552	77.5093	75.5325	128.899	133.612	131.878	130.965	153.19	92.5587	105.854	173.279	126.636	140.844	121.284	up
AT1G61520	1031.54	833.749	1029.23	807.974	1294.84	1167.33	981.468	1342.11	982.805	1300.69	1923.89	1482.28	1976.91	1388.71	up
AT4G10340	921.864	846.318	1099.79	800.114	1129.73	1180.72	1038.48	1194.34	1082.1	1216.59	1771.41	1567.92	1873.4	1499.88	up
AT3G54890	1229.39	960.836	1079.04	836.268	1380.66	1380.6	1089.32	1464.12	1152.78	1397.85	2056.57	1888.61	2160.18	1557.16	up
AT1G03600	235.125	159.208	238.218	196.492	228.118	216.363	240.36	210.128	188.483	198.657	410.919	340.734	375.019	363.853	up
AT1G53130	136.201	154.32	138.615	229.502	158.597	198.848	257.308	128.788	168.289	181.256	185.161	245.074	284.234	297.147	up
AT3G50820	287.455	236.019	297.15	251.509	266.138	298.787	257.308	254.865	274.31	243.608	521.817	418.174	540.468	458.859	up
AT2G06520	1857.35	1503.4	2040.21	1529.49	2072.62	2100.78	1918.25	2226	1765.35	2320.08	3284.38	2902.62	3644.13	2935.76	up
AT5G38410	8029.39	5235.02	8104.39	5684.11	7287.84	7252.27	7431.12	8815.87	7074.85	9741.43	14023.7	11823.7	13302.1	11388.6	up
AT1G74470	256.631	194.821	233.238	201.207	248.758	275.09	243.441	275.2	228.872	327.711	427.752	357.133	484.47	360.484	up
AT4G15800	122.581	114.518	132.804	147.762	124.922	118.484	124.802	115.231	173.337	155.155	237.64	218.653	173.086	254.023	up
AT4G24130	782.079	528.599	405.053	900.718	1069.98	1101.39	844.34	984.211	706.812	909.181	1145.62	920.164	1022.39	1009.36	up
AT5G10810	136.201	124.294	120.354	141.474	182.495	145.272	100.15	74.5614	53.8523	134.855	225.758	210.453	263.022	211.574	up
AT1G42970	424.373	317.02	454.025	403.987	382.37	405.938	392.896	431.101	419.038	391.513	775.3	583.075	765.31	738.487	up
AT1G32470	98.2079	87.2852	125.334	72.3089	96.6787	116.424	103.231	97.6077	112.753	117.454	177.24	189.499	208.721	169.124	up
AT2G05100	844.444	671.747	879.829	543.889	797.328	847.936	761.139	940.83	789.273	1091.89	1702.1	1176.17	1710.49	1217.56	up
ATCG00900	118.28	117.311	153.555	133.614	122.749	182.363	187.974	164.035	151.46	159.505	177.24	233.23	240.114	296.473	up
ATCG01240	118.28	117.311	153.555	135.186	122.749	184.423	187.974	164.035	156.508	158.055	177.24	233.23	240.962	296.473	up
AT5G24780	1816.49	1110.27	1882.5	1741.7	1216.63	1850.42	2076.95	1146.89	982.805	1861.86	2789.3	2910.82	2461.38	3664.81	up
AT5G09660	148.387	99.8543	138.615	88.0283	127.094	133.939	140.21	147.767	122.851	192.856	264.374	204.987	254.538	227.745	up
AT2G26500	725.448	562.117	833.348	592.619	811.449	845.875	739.568	931.34	683.251	865.679	1438.71	1193.48	1343.96	1243.16	up
AT3G61260	76.7025	136.863	129.484	213.783	248.758	252.423	214.167	269.777	178.386	181.256	208.925	243.251	231.629	161.712	up
AT4G02770	1083.87	926.62	1215.16	960.451	1416.51	1334.24	1155.58	1447.85	1050.12	1423.95	2092.22	1853.08	2284.9	1740.43	up
AT2G39360	80.2867	130.579	119.524	122.611	132.526	123.636	109.394	116.587	94.2416	155.155	218.827	217.742	212.963	168.451	up
AT1G15820	96.7742	111.725	126.164	94.316	142.302	117.454	109.394	132.855	144.728	184.156	200.014	164.901	230.781	233.135	up
AT3G46780	63.7993	59.354	85.4928	67.5931	79.2983	77.2724	73.9568	93.5407	92.5587	84.1028	136.643	121.17	145.087	113.873	up
AT4G28750	258.781	224.149	249.838	188.632	286.777	289.514	285.042	352.472	245.701	400.213	474.29	363.511	528.59	454.143	up
AT3G14660	38.7097	43.2935	53.9518	55.0177	52.1413	56.6664	60.0899	77.2728	60.5839	85.5529	68.3215	92.0164	87.3913	90.9633	up
AT2G20260	92.4731	69.8282	97.1132	81.7405	95.5924	112.303	87.8237	120.654	97.6074	113.104	176.25	157.612	182.419	130.718	up
AT5G01810	54.4803	50.2763	69.7223	78.5967	60.8316	51.5149	36.9784	47.4482	87.51	89.903	111.889	113.882	90.7851	119.937	up
AT3G48420	122.581	67.7333	89.643	66.0212	87.9885	84.4845	75.4976	132.855	111.07	108.754	198.033	149.413	192.6	164.408	up
AT4G21280	417.921	319.813	513.787	386.696	439.942	508.968	546.972	502.951	482.988	503.167	773.32	786.24	886.64	711.535	up
AT3G52500	150.538	203.2	287.19	312.815	430.166	392.544	386.732	241.308	286.091	255.209	346.558	413.618	435.26	435.95	up
AT1G32060	126.882	106.837	136.955	91.1721	162.942	134.969	83.2014	136.922	116.119	172.556	289.128	238.696	215.509	203.488	up
AT3G16520	50.1792	53.0694	52.2917	47.158	80.3846	75.2118	57.0084	82.6954	38.7064	65.2522	106.938	94.7496	116.239	80.1824	up
AT1G75220	98.9247	122.898	105.414	166.625	228.118	181.333	169.484	201.994	180.069	137.755	193.082	273.316	206.176	167.103	up
AT1G68410	60.9319	53.7677	58.1019	110.035	99.9376	95.8178	104.772	82.6954	112.753	98.6033	135.653	112.971	93.3305	107.808	up
AT1G74880	29.3907	20.9485	37.3512	36.1545	22.8118	26.7878	23.1115	33.8916	20.1946	24.6508	67.3313	49.1969	55.9983	55.9256	up
AT4G18440	24.3728	22.345	25.7309	11.0035	27.1569	42.2422	21.5707	24.4019	23.5604	24.6508	43.5673	51.019	43.2714	51.209	up
AT1G08380	1080.29	826.766	1060.78	809.546	1219.89	1273.45	1052.34	1298.72	1051.8	1360.15	2109.05	1690.01	2313.75	1693.26	up
AT1G70520	23.6559	48.1815	43.9915	56.5896	61.9178	65.9391	52.3861	54.2265	57.2181	39.1513	85.1543	77.4396	77.2098	65.3588	up
AT2G01590	41.5771	24.4399	47.3116	31.4387	44.5374	36.0605	29.2746	50.1595	33.6577	65.2522	78.2231	74.7064	72.9675	74.1182	up
AT4G33610	89.6057	120.803	129.484	144.618	128.181	164.848	137.128	79.9841	90.8758	84.1028	249.522	187.677	224.842	242.569	up
AT3G17390	260.215	300.261	488.056	550.177	512.723	268.908	366.703	527.353	528.426	696.023	638.657	906.499	522.651	727.706	up
AT2G44290	46.595	31.4227	36.5212	37.7264	48.8825	38.1211	40.0599	47.4482	31.9748	52.2018	83.1739	85.6391	74.6644	61.9898	up
AT1G20190	158.423	324.003	283.869	454.289	543.139	555.331	533.105	429.745	361.82	258.109	465.378	409.063	705.07	468.292	up
AT3G05490	221.505	252.778	258.969	459.004	420.389	419.332	460.689	344.338	484.671	394.413	526.768	620.428	377.564	450.1	up
AT3G47470	1108.24	888.215	1201.05	899.146	1479.51	1555.75	1243.4	1582.06	1181.39	1657.41	2405.11	1973.34	2433.38	1821.96	up
AT3G08770	100.358	50.9746	83.0028	40.8703	63.0041	95.8178	64.7122	65.0718	35.3406	47.8516	144.564	174.922	123.875	190.686	up
AT5G25280	92.4731	66.3368	94.6232	128.899	135.785	159.696	114.017	122.01	102.656	118.904	150.505	153.057	193.449	193.381	up
AT3G21055	711.111	532.789	857.419	583.187	889.661	976.723	859.748	925.918	796.005	1003.43	1551.59	1392.09	1606.98	1255.97	up
AT2G46810	20.0717	18.1553	18.2606	22.0071	27.1569	18.5454	27.7338	20.3349	11.7802	15.9505	39.6066	34.62	40.726	41.7757	up
AT4G02540	28.6738	30.7244	33.2011	61.3054	41.2786	29.8787	43.1415	52.8708	35.3406	37.7013	82.1838	68.329	62.786	47.1661	up
AT3G22240	1873.83	2301.54	2223.64	3279.05	3075.25	3665.8	3748.69	1931.82	2754.88	2324.43	4178.5	4442.3	4685.19	4693.7	up
AT1G24020	299.642	139.656	239.048	213.783	242.24	451.271	311.235	264.354	107.705	139.205	359.43	678.735	329.202	541.737	up
AT4G38860	55.1971	56.5608	92.1331	141.474	142.302	153.515	155.617	84.0511	116.119	104.404	161.397	105.682	157.813	149.584	up
AT5G15780	117.563	55.1643	102.093	66.0212	69.5218	81.3936	80.1199	107.097	42.0721	104.404	200.014	178.567	223.993	171.82	up
AT2G38530	3097.49	3580.79	3116.75	4887.14	5984.3	5825.31	5660.78	3088.2	3281.63	4183.39	7916.38	6578.72	7872	5295.41	up
AT3G61470	697.491	537.677	696.393	468.436	852.728	807.754	659.448	990.989	762.347	891.78	1501.09	1251.79	1575.59	1138.05	up
AT5G15350	117.563	150.829	160.195	290.808	318.279	218.423	277.338	352.472	306.285	291.46	317.843	369.888	260.477	266.826	up
AT3G01500	1984.23	1194.06	1965.51	1042.19	1678.3	1510.42	1352.79	2003.67	1561.72	2409.98	4479.51	3236.97	4163.39	2825.25	up
AT2G21650	69.534	84.4921	146.085	141.474	209.652	190.605	221.87	146.412	156.508	134.855	179.22	222.297	222.296	234.483	up
AT2G05070	543.369	424.555	525.408	268.801	538.794	548.119	477.638	616.826	489.72	736.625	1252.56	877.345	1258.26	894.135	up
AT1G03130	327.598	253.476	360.232	281.376	470.358	454.362	351.295	494.817	306.285	506.067	736.684	614.961	804.339	547.801	up
AT3G60580	17.2043	18.8536	19.9207	47.158	24.9844	28.8484	40.0599	18.9793	31.9748	29.001	48.5181	36.4422	37.3322	39.7543	up
AT3G07470	95.3405	143.846	146.085	190.204	161.855	159.696	195.677	188.437	242.335	214.607	332.696	311.58	212.963	260.088	up
AT2G12480	34.4086	45.3883	28.2209	66.0212	23.8981	46.3634	47.7638	27.1133	48.8037	37.7013	50.4985	81.9949	81.4521	99.7227	up
AT3G08940	195.699	191.329	233.238	141.474	301.985	303.938	271.175	360.606	264.213	265.359	538.65	349.845	560.831	390.131	up
AT1G20620	579.211	472.737	634.141	328.534	825.571	927.269	480.719	1011.32	489.72	913.531	1406.04	1262.72	1529.77	811.258	up
AT5G67480	41.5771	61.4488	70.5524	88.0283	79.2983	85.5148	81.6606	107.097	131.265	130.504	171.299	119.348	111.148	114.546	up
AT1G29930	275.269	241.606	346.122	201.207	424.735	389.453	298.909	524.641	341.626	513.317	765.398	557.565	728.826	528.261	up
AT2G37540	26.5233	35.6124	45.6515	70.737	121.663	113.333	90.9052	115.231	82.4614	97.1533	88.1248	89.2833	82.3005	62.6636	up
AT4G04205	28.6738	32.121	45.6515	28.2948	23.8981	25.7575	26.193	35.2472	26.9262	30.451	67.3313	84.728	69.5737	97.7013	up
AT3G22235	998.566	1254.11	1222.63	1725.98	1679.39	1969.93	1984.51	1042.5	1450.65	1236.89	2462.54	2625.66	2698.95	2648.04	up
AT1G64370	90.3226	108.932	107.904	185.488	198.789	236.969	206.463	65.0718	134.631	84.1028	269.325	194.054	262.174	197.424	up
AT1G76100	372.043	300.261	527.068	267.229	369.334	275.09	254.227	502.951	311.334	623.521	893.13	763.463	1116.57	844.948	up
AT1G29920	550.538	488.099	721.294	317.53	624.61	705.755	491.505	887.959	644.545	991.833	1576.34	1141.55	1499.23	1101.67	up
AT2G07080	49.4624	30.0261	55.6119	77.0247	74.9532	77.2724	83.2014	74.5614	62.2668	87.0029	108.918	79.2617	100.967	123.306	up
AT2G23690	40.8602	41.8969	50.6317	53.4457	38.0197	52.5452	32.3561	37.9586	67.3154	30.451	136.643	95.6607	67.8767	107.808	up
AT1G22530	44.4444	90.0784	126.164	218.499	108.628	122.606	124.802	184.37	200.263	172.556	217.837	239.607	151.874	195.403	up
AT3G52870	220.072	289.089	284.699	493.587	366.076	370.908	462.23	188.437	375.283	250.858	695.097	591.274	565.922	599.684	up
AT1G21010	48.7455	28.6296	17.4306	40.8703	40.1923	18.5454	49.3045	39.3142	21.8775	31.9011	91.0953	46.4638	64.4829	92.3109	up
AT1G29670	31.5412	24.4399	25.7309	47.158	76.0394	95.8178	75.4976	59.6492	53.8523	42.0514	71.292	85.6391	42.423	54.578	up
AT3G62410	84.5878	61.4488	98.7733	73.8809	98.8513	114.363	63.1714	107.097	75.7298	113.104	211.896	154.879	215.509	184.622	up
AT1G70090	44.4444	39.1038	40.6714	62.8773	48.8825	73.1512	69.3345	43.3812	72.3641	72.5024	116.84	125.725	50.9075	97.0275	up
AT2G38870	50.1792	41.8969	73.8725	44.0141	69.5218	89.636	92.446	75.9171	70.6812	82.6528	104.958	107.504	139.147	170.472	up
AT5G64900	37.9928	76.1127	76.3625	182.344	162.942	165.878	174.107	122.01	169.971	81.2027	148.525	235.052	116.239	101.07	up
AT5G38420	1943.37	1046.03	1935.62	853.56	1642.45	1570.18	1486.84	2228.71	1743.47	2789.89	4620.11	3382.74	4206.66	3352.17	up
AT1G05993	62.3656	46.0866	62.2521	62.8773	49.9688	36.0605	49.3045	47.4482	33.6577	44.9515	121.79	153.057	142.541	127.349	up
AT1G61100	79.5699	99.156	116.204	176.057	111.887	149.393	129.424	105.742	212.044	152.255	306.951	223.208	185.813	233.135	up
AT3G07460	42.2939	51.6729	67.2322	81.7405	105.369	100.969	89.3645	86.7624	109.388	101.503	147.535	121.17	123.875	128.022	up
AT2G47630	39.4265	19.5519	15.7705	67.5931	51.0551	40.1816	36.9784	33.8916	38.7064	33.3511	72.2821	69.2401	51.756	49.8613	up
AT1G21500	265.233	180.855	318.731	179.2	439.942	400.786	380.569	444.657	306.285	443.715	657.47	634.094	723.736	497.94	up
AT3G06880	11.4695	16.0605	19.9207	7.85967	10.8628	10.303	9.2446	8.13398	20.1946	17.4006	40.5968	46.4638	39.0291	30.3211	up
AT4G20260	232.975	314.227	481.416	526.598	1215.54	957.147	639.418	915.072	644.545	1116.54	765.398	984.849	931.608	715.578	up
AT5G54380	24.3728	43.2935	45.6515	70.737	66.2629	69.03	90.9052	86.7624	99.2902	65.2522	97.0363	108.415	78.9067	90.9633	up
AT1G29910	262.366	199.01	250.668	149.334	299.813	311.15	252.686	356.539	267.579	368.312	667.372	531.144	693.191	471.661	up
AT5G49730	67.3835	57.2591	72.2124	81.7405	187.926	165.878	83.2014	124.721	72.3641	94.2532	207.935	115.704	229.084	107.808	up
AT2G42610	17.2043	16.7588	23.2408	17.2913	29.3295	33.9999	41.6007	17.6236	10.0973	20.3007	43.5673	40.0864	65.3314	43.7971	up
AT3G15115	43.7276	55.8626	78.8526	108.463	73.8669	73.1512	57.0084	54.2265	119.485	39.1513	191.102	143.035	123.875	145.541	up
AT2G34620	15.0538	8.37938	10.7904	12.5755	20.6393	23.6969	12.3261	12.201	16.8289	13.0504	35.646	24.5985	28.8476	26.9521	up
AT4G31550	22.2222	27.9313	15.7705	56.5896	24.9844	44.3028	44.6822	31.1802	28.6091	42.0514	64.3608	64.6848	33.0899	61.9898	up
AT5G67340	328.315	534.186	191.736	877.139	429.08	649.088	719.538	311.802	496.451	336.411	1048.59	511.101	996.939	1039	up
AT5G37540	66.6667	28.6296	38.1813	53.4457	69.5218	27.8181	46.223	35.2472	38.7064	92.8031	149.515	129.37	76.3613	101.07	up
AT5G50200	79.5699	50.9746	39.8413	70.737	111.887	114.363	114.017	88.1181	48.8037	78.3026	153.476	119.348	168.843	141.498	up
AT1G76090	39.4265	59.354	96.2832	125.755	53.2276	39.1514	78.5791	84.0511	99.2902	124.704	180.21	150.324	156.965	185.969	up
AT5G65920	18.638	30.0261	24.0708	48.7299	16.2942	26.7878	18.4892	21.6906	45.4379	17.4006	82.1838	70.1512	33.0899	66.7064	up
AT4G38690	32.2581	60.0522	66.4022	86.4563	86.9022	76.2421	63.1714	65.0718	87.51	91.3531	147.535	133.014	160.359	114.546	up
AT5G28450	17.2043	26.5347	20.7507	17.2913	38.0197	30.909	27.7338	24.4019	31.9748	43.5015	48.5181	53.7522	66.1798	58.6208	up
AT1G09415	19.3548	9.07767	18.2606	17.2913	17.3804	14.4242	9.2446	23.0463	15.146	20.3007	27.7246	38.2643	58.5437	40.4281	up
AT3G10815	59.4982	64.2419	45.6515	139.902	74.9532	58.727	124.802	47.4482	114.436	72.5024	191.102	190.41	89.0882	131.391	up
AT5G62090	12.9032	11.1725	14.9405	22.0071	21.7256	17.5151	18.4892	13.5566	21.8775	24.6508	45.5476	30.0648	31.393	31.6687	up
AT1G70820	13.6201	9.07767	9.1303	11.0035	16.2942	14.4242	15.4077	13.5566	8.41443	8.70029	37.6263	15.4879	35.6353	26.9521	up
AT1G12110	25.0896	13.2674	11.6204	34.5825	14.1216	14.4242	32.3561	43.3812	25.2433	33.3511	54.4591	42.8195	40.726	45.1447	up
AT5G09520	17.2043	16.7588	21.5807	45.5861	28.2432	35.0302	36.9784	21.6906	20.1946	18.8506	56.4395	38.2643	64.4829	44.4709	up
AT4G33050	44.4444	45.3883	21.5807	44.0141	77.1257	78.3027	84.7422	51.5152	26.9262	59.452	137.633	154.879	61.9375	55.9256	up
AT1G32170	103.943	124.294	120.354	238.934	177.063	182.363	171.025	231.818	334.894	192.856	438.644	385.376	224.842	243.916	up
AT2G06850	7.8853	7.6811	9.1303	37.7264	27.1569	11.3333	32.3561	32.5359	13.4631	20.3007	28.7148	17.31	19.5146	26.2783	up
AT2G25000	40.8602	55.8626	55.6119	116.323	71.6943	62.8482	69.3345	67.7831	58.901	60.902	153.476	140.302	151.026	121.958	up
AT5G50670	64.5161	87.2852	60.592	245.222	130.353	115.393	141.751	101.675	195.215	124.704	233.679	263.295	128.966	169.798	up
AT5G50570	64.5161	87.2852	60.592	245.222	130.353	115.393	141.751	101.675	196.898	124.704	233.679	263.295	129.814	169.798	up
AT5G57520	27.2401	6.98282	17.4306	20.4351	10.8628	16.4848	16.9484	28.4689	21.8775	40.6014	69.3116	28.2427	43.2714	53.9042	up
AT1G29395	37.276	23.7416	23.2408	17.2913	31.5021	20.606	21.5707	62.3605	21.8775	63.8021	112.879	53.7522	89.9367	61.316	up
AT2G21880	27.957	67.7333	49.8017	122.611	115.145	98.9087	120.18	100.319	114.436	94.2532	158.427	110.238	140.844	139.477	up
AT4G15258	11.4695	18.1553	19.0906	20.4351	10.8628	8.24239	15.4077	13.5566	6.73154	15.9505	41.587	51.9301	40.726	51.209	up
AT5G23970	75.9856	136.863	120.354	350.541	364.989	398.726	365.162	166.746	141.362	102.953	292.099	273.316	389.443	317.361	up
AT3G54810	60.9319	27.233	42.3314	78.5967	27.1569	57.6967	46.223	55.5822	74.047	43.5015	191.102	129.37	50.0591	131.391	up
AT2G28630	20.0717	16.0605	34.0311	51.8738	70.6081	45.3331	44.6822	39.3142	26.9262	20.3007	55.4493	82.9059	60.2406	72.0968	up
AT2G27500	17.9211	13.2674	15.7705	22.0071	26.0707	13.3939	29.2746	6.77831	25.2433	23.2008	51.4886	61.0406	25.4538	45.1447	up
AT1G35140	454.48	826.766	914.69	1647.39	1301.36	1226.06	1358.96	974.721	1899.98	1371.75	2353.62	2280.37	1853.88	2114.39	up
AT2G17230	6.45161	25.8364	29.051	50.3019	36.9334	38.1211	36.9784	55.5822	50.4866	68.1523	68.3215	71.9733	46.6653	54.578	up
AT3G02550	9.31899	9.77595	7.47025	40.8703	34.7609	30.909	16.9484	35.2472	30.2919	21.7507	24.7542	27.3316	28.8476	24.2569	up
AT1G11170	8.60215	10.4742	4.15014	12.5755	28.2432	24.7272	24.6523	21.6906	10.0973	15.9505	24.7542	27.3316	24.6053	18.8665	up
AT5G43040	25.8064	33.5175	39.8413	83.3125	40.1923	57.6967	47.7638	37.9586	74.047	26.1009	155.456	99.3049	71.2706	86.9205	up
AT4G30270	90.3226	198.312	185.096	287.664	870.108	472.907	254.227	688.677	363.503	1090.44	426.762	691.49	386.897	484.464	up
AT2G23130	13.6201	10.4742	34.0311	25.1509	5.43139	13.3939	18.4892	6.77831	28.6091	47.8516	71.292	62.8627	37.3322	79.5086	up
AT3G58620	8.60215	10.4742	8.30028	25.1509	6.51767	14.4242	15.4077	8.13398	31.9748	21.7507	30.6951	32.7979	30.5445	24.2569	up
AT2G21210	5.73477	9.77595	6.64022	9.4316	9.7765	4.12119	10.7854	10.8453	1.68289	13.0504	26.7345	13.6658	20.363	35.0377	up
AT1G02070	46.595	18.1553	17.4306	51.8738	72.7806	61.8179	33.8969	39.3142	25.2433	36.2512	143.574	64.6848	113.694	68.054	up
AT5G44390	5.73477	6.98282	4.98017	9.4316	10.8628	3.0909	1.54077	6.77831	5.04866	5.8002	31.6853	8.19949	16.9692	27.6259	up
AT5G44568	45.8781	74.7162	34.0311	135.186	245.499	248.302	241.9	124.721	99.2902	140.655	173.279	290.626	138.299	138.803	up
AT2G36410	17.2043	21.6467	20.7507	37.7264	51.0551	33.9999	44.6822	69.1388	47.1208	47.8516	76.2428	94.7496	61.0891	53.9042	up
AT3G63160	17.9211	18.1553	34.8612	9.4316	24.9844	32.9696	16.9484	51.5152	15.146	31.9011	115.849	60.1296	85.6944	85.5729	up
AT2G39010	366.308	233.924	290.51	631.917	751.704	863.39	861.289	344.338	408.941	382.813	974.323	1202.59	1071.6	1138.05	up
AT5G15160	35.8423	8.37938	16.6006	28.2948	16.2942	17.5151	35.4376	31.1802	23.5604	24.6508	110.899	62.8627	55.1498	73.4444	up
AT5G50915	14.3369	14.6639	38.1813	14.1474	8.69022	16.4848	10.7854	28.4689	28.6091	81.2027	75.2526	111.149	88.2398	66.7064	up
AT2G44500	27.957	23.0433	18.2606	56.5896	34.7609	40.1816	43.1415	23.0463	72.3641	69.6023	115.849	133.014	47.5137	72.7706	up
AT1G72790	7.8853	26.5347	29.881	61.3054	58.659	54.6058	72.416	81.3398	106.022	73.9525	89.1149	127.548	63.6344	73.4444	up
AT1G75240	22.9391	12.5691	21.5807	51.8738	54.3139	42.2422	44.6822	52.8708	38.7064	36.2512	86.1444	82.9059	95.8759	57.2732	up
AT4G26530	10.7527	6.28454	25.7309	6.28773	31.5021	23.6969	10.7854	27.1133	28.6091	50.7517	90.1051	42.8195	72.119	38.4067	up
AT3G14210	11.4695	9.77595	9.96033	0	4.34511	15.4545	10.7854	8.13398	5.04866	23.2008	40.5968	51.9301	39.8776	45.8185	up
AT5G57785	24.3728	5.58626	7.47025	18.8632	19.553	5.15149	20.03	20.3349	16.8289	27.5509	63.3706	38.2643	70.4221	43.1233	up
AT1G75190	5.01792	4.18969	6.64022	9.4316	16.2942	14.4242	15.4077	20.3349	15.146	17.4006	30.6951	22.7763	20.363	17.5189	up
AT5G05810	6.45161	6.98282	3.32011	18.8632	13.0353	26.7878	7.70383	6.77831	8.41443	11.6004	34.6558	32.7979	7.63613	21.5617	up
AT2G34870	97.491	57.2591	49.8017	185.488	161.855	223.575	177.188	89.4737	84.1443	71.0524	310.912	306.114	282.537	293.778	up
AT4G31800	160.573	341.46	187.586	559.608	502.947	711.936	416.007	265.71	484.671	616.271	1107.01	1928.7	340.232	794.413	up
AT1G49130	5.01792	5.58626	9.96033	14.1474	42.3648	36.0605	18.4892	39.3142	13.4631	13.0504	22.7738	26.4206	51.756	24.2569	up
AT2G16660	14.3369	19.5519	24.9008	55.0177	137.957	71.0906	50.8453	220.973	40.3892	137.755	97.0363	112.06	91.6336	60.6422	up
AT4G14640	4.30107	4.18969	17.4306	22.0071	47.7962	47.3937	15.4077	17.6236	10.0973	15.9505	38.6165	48.2859	32.2414	44.4709	up
AT4G31000	0.716846	6.98282	4.15014	28.2948	10.8628	13.3939	20.03	14.9123	25.2433	10.1503	22.7738	26.4206	13.5753	12.1284	up
AT4G37240	18.638	13.9656	19.9207	25.1509	55.4002	62.8482	27.7338	36.6029	38.7064	39.1513	128.722	135.747	39.8776	46.4923	up
AT1G31140	10.0358	11.8708	1.66006	33.0106	18.4667	19.5757	7.70383	5.42265	15.146	4.35015	43.5673	29.1537	45.8168	41.7757	up
AT1G75590	7.16846	7.6811	13.2804	22.0071	35.8472	22.6666	38.5192	24.4019	21.8775	26.1009	56.4395	31.8869	52.6045	51.8828	up
AT1G72150	131.9	161.303	229.088	576.899	708.253	492.483	468.393	764.594	482.988	648.172	1023.83	989.405	747.493	838.21	up
AT5G01870	9.31899	23.7416	43.9915	50.3019	27.1569	31.9393	35.4376	9.48964	30.2919	14.5005	152.486	98.3938	142.541	143.52	up
AT1G05300	2.15054	4.88797	6.64022	28.2948	67.3492	94.7875	43.1415	25.7576	6.73154	30.451	24.7542	18.2211	30.5445	22.2355	up
AT5G44910	1.43369	2.79313	4.98017	7.85967	17.3804	15.4545	10.7854	10.8453	13.4631	7.25024	19.8033	11.8437	22.0599	12.8022	up
AT2G04495	1.43369	13.2674	4.98017	18.8632	9.7765	17.5151	16.9484	5.42265	13.4631	13.0504	41.587	47.3748	21.2115	36.3853	up
AT1G60960	6.45161	6.28454	1.66006	9.4316	15.2079	9.27269	6.16307	14.9123	1.68289	17.4006	34.6558	17.31	33.0899	22.9093	up
AT1G54095	4.30107	1.39656	3.32011	6.28773	20.6393	5.15149	7.70383	5.42265	6.73154	13.0504	23.764	10.0216	18.6661	17.5189	up
AT2G34430	7.8853	2.09485	4.98017	7.85967	16.2942	7.21209	4.6223	29.8246	3.36577	44.9515	29.705	28.2427	44.9683	13.476	up
AT1G50040	6.45161	7.6811	4.15014	14.1474	14.1216	16.4848	9.2446	6.77831	23.5604	8.70029	52.4788	42.8195	12.7269	35.0377	up
AT3G62570	10.7527	23.0433	8.30028	44.0141	13.0353	20.606	18.4892	5.42265	57.2181	15.9505	99.0166	53.7522	46.6653	132.739	up
AT4G25631	2.15054	1.39656	3.32011	1.57193	1.08628	2.0606	0	0	0	1.45005	8.91149	13.6658	23.7569	8.75943	up
AT3G23730	13.6201	3.49141	14.1105	36.1545	4.34511	9.27269	16.9484	20.3349	6.73154	39.1513	51.4886	100.216	39.0291	63.3374	up
AT1G17990	5.01792	1.39656	1.66006	9.4316	6.51767	1.0303	4.6223	8.13398	13.4631	14.5005	21.7837	13.6658	17.8176	13.476	up
AT1G18020	5.01792	1.39656	1.66006	9.4316	6.51767	1.0303	4.6223	8.13398	13.4631	14.5005	21.7837	13.6658	17.8176	13.476	up
AT1G72140	7.8853	9.77595	8.30028	62.8773	47.7962	36.0605	46.223	43.3812	23.5604	17.4006	64.3608	53.7522	49.2106	55.9256	up
AT3G29370	5.73477	8.37938	7.47025	34.5825	11.9491	13.3939	26.193	4.06699	6.73154	10.1503	37.6263	44.6416	29.6961	75.4658	up
AT3G04720	5.01792	4.88797	4.15014	1.57193	14.1216	10.303	12.3261	28.4689	0	31.9011	24.7542	35.5311	33.0899	28.9735	up
AT2G23620	5.01792	24.4399	27.3909	103.748	85.8159	105.09	83.2014	32.5359	33.6577	34.8012	122.781	151.235	127.269	111.851	up
AT5G14740	99.6416	54.466	75.5325	14.1474	94.5062	65.9391	55.4676	143.7	85.8272	281.309	834.71	268.761	657.556	347.682	up
AT3G45530	1.43369	2.79313	5.81019	14.1474	15.2079	15.4545	6.16307	9.48964	11.7802	7.25024	37.6263	22.7763	22.0599	16.1712	up
AT1G63710	0.716846	5.58626	14.9405	42.4422	29.3295	37.0908	36.9784	12.201	13.4631	14.5005	38.6165	65.5959	51.756	55.9256	up
AT4G37740	2.15054	2.79313	0.830028	9.4316	5.43139	5.15149	9.2446	12.201	8.41443	11.6004	28.7148	9.11054	12.7269	8.08562	up
AT1G66160	7.16846	4.18969	3.32011	7.85967	14.1216	4.12119	6.16307	8.13398	6.73154	8.70029	46.5378	66.5069	11.8784	24.2569	up
AT3G58850	45.1613	41.8969	65.5722	207.495	236.809	211.211	278.879	127.432	104.339	71.0524	346.558	407.241	433.563	408.998	up
AT2G19590	8.60215	10.4742	6.64022	39.2983	51.0551	53.5755	41.6007	21.6906	18.5117	21.7507	88.1248	40.9974	67.8767	72.0968	up
AT2G43620	0.716846	2.79313	1.66006	12.5755	1.08628	3.0909	16.9484	2.71133	1.68289	5.8002	10.8918	6.37738	15.2723	28.9735	up
AT4G25810	10.0358	13.2674	6.64022	67.5931	254.189	130.848	72.416	115.231	77.4127	84.1028	115.849	178.567	27.9992	43.7971	up
AT1G57990	2.86738	3.49141	3.32011	11.0035	30.4158	30.909	13.8669	12.201	6.73154	18.8506	28.7148	46.4638	21.2115	27.6259	up
AT1G70270	11.4695	21.6467	62.2521	202.779	171.632	165.878	214.167	24.4019	62.2668	27.5509	243.581	413.618	245.205	322.751	up
AT5G25240	3.58423	0.698282	4.15014	9.4316	9.7765	5.15149	4.6223	5.42265	11.7802	7.25024	29.705	41.9085	12.7269	27.6259	up
AT3G05800	1.43369	1.39656	2.49008	3.14387	7.60394	9.27269	3.08153	4.06699	6.73154	2.9001	17.823	27.3316	11.03	14.8236	up
AT3G53232	1.43369	4.18969	1.66006	0	3.25883	1.0303	7.70383	2.71133	0	4.35015	12.8722	12.7548	17.8176	54.578	up
AT1G14250	1.43369	0.698282	0.830028	0	2.17256	0	0	2.71133	0	1.45005	18.8132	9.11054	10.1815	3.36901	up
AT1G68520	7.16846	4.88797	7.47025	18.8632	48.8825	26.7878	33.8969	88.1181	28.6091	79.7527	67.3313	52.8411	94.179	59.2946	up
AT4G08950	43.7276	43.9918	28.2209	155.621	127.094	96.8481	90.9052	104.386	201.946	126.154	585.188	631.36	110.3	361.832	up
AT3G22231	5.01792	13.2674	22.4107	15.7193	48.8825	49.4543	27.7338	28.4689	20.1946	30.451	192.092	187.677	156.116	109.83	up
AT2G45180	2.15054	2.79313	5.81019	26.7229	36.9334	26.7878	20.03	158.613	20.1946	79.7527	35.646	58.3075	24.6053	68.7278	up
AT1G22290	0.716846	1.39656	1.66006	17.2913	6.51767	1.0303	1.54077	5.42265	13.4631	5.8002	23.764	35.5311	10.1815	10.7808	up
AT2G39410	1.43369	0	0	0	3.25883	1.0303	0	2.71133	0	0	9.90166	6.37738	6.78767	11.4546	up
AT1G67640	0	1.39656	0	6.28773	3.25883	4.12119	3.08153	1.35566	1.68289	0	10.8918	9.11054	8.48459	9.43323	up
AT2G39030	0	0.698282	0.830028	0	0	0	1.54077	0	0	1.45005	23.764	2.73316	11.03	4.71661	up
AT4G30670	0.716846	0	0.830028	1.57193	19.553	5.15149	6.16307	12.201	0	18.8506	18.8132	9.11054	2.54538	22.9093	up
AT1G13110	0	0	0.830028	1.57193	6.51767	3.0909	4.6223	1.35566	3.36577	0	6.93116	9.11054	12.7269	10.107	up
AT1G54870	0.716846	1.39656	0	12.5755	7.60394	4.12119	4.6223	4.06699	1.68289	1.45005	28.7148	7.28843	35.6353	30.9949	up
AT3G23970	0	0	0	1.57193	2.17256	1.0303	0	1.35566	0	1.45005	4.95083	1.82211	9.33305	5.39042	up
