# Supplementary material for: A phase-separated transcription factor regulates an interspecific barrier
Source: Research Square preprint supplement (doi:10.21203/rs.3.rs-2015853/v1), 2022-10-28
Supplement: Supplementary file 3 [file bf778589629bda1f9b562ecc.xlsx]

## Sheet: downregulated_in_spri2spri2l
GO biological process complete	Arabidopsis thaliana - REFLIST (27430)	upload_1 (295)	upload_1 (expected)	upload_1 (over/under)	upload_1 (fold Enrichment)	upload_1 (P-value)
Unclassified (UNCLASSIFIED)	5631	47	60.56	-	0.78	0
cell wall organization or biogenesis (GO:0071554)	519	47	5.58	+	8.42	1.48e-24
xylan metabolic process (GO:0045491)	61	19	0.66	+	28.96	3.35e-17
plant-type cell wall organization or biogenesis (GO:0071669)	270	30	2.9	+	10.33	5.65e-17
plant-type secondary cell wall biogenesis (GO:0009834)	64	18	0.69	+	26.15	1.65e-15
cell wall biogenesis (GO:0042546)	244	27	2.62	+	10.29	5.39e-15
plant-type cell wall biogenesis (GO:0009832)	161	22	1.73	+	12.71	1.56e-13
hemicellulose metabolic process (GO:0010410)	113	19	1.22	+	15.63	7.27e-13
cell wall polysaccharide metabolic process (GO:0010383)	147	20	1.58	+	12.65	4.56e-12
polysaccharide metabolic process (GO:0005976)	423	30	4.55	+	6.59	5.29e-12
cell wall macromolecule metabolic process (GO:0044036)	177	21	1.9	+	11.03	1.05e-11
carbohydrate metabolic process (GO:0005975)	961	41	10.34	+	3.97	4.46e-10
cellular polysaccharide metabolic process (GO:0044264)	275	23	2.96	+	7.78	4.81e-10
lignin metabolic process (GO:0009808)	53	13	0.57	+	22.81	6.07e-10
cellular carbohydrate metabolic process (GO:0044262)	389	25	4.18	+	5.98	9.92e-09
xylan biosynthetic process (GO:0045492)	40	11	0.43	+	25.57	1.53e-08
phenylpropanoid metabolic process (GO:0009698)	110	15	1.18	+	12.68	1.61e-08
lignin biosynthetic process (GO:0009809)	42	11	0.45	+	24.35	2.41e-08
phenylpropanoid biosynthetic process (GO:0009699)	88	13	0.95	+	13.74	1.74e-07
cell wall polysaccharide biosynthetic process (GO:0070592)	85	12	0.91	+	13.13	1.53e-06
cellular component macromolecule biosynthetic process (GO:0070589)	89	12	0.96	+	12.54	2.47e-06
cell wall macromolecule biosynthetic process (GO:0044038)	89	12	0.96	+	12.54	2.47e-06
cellular polysaccharide biosynthetic process (GO:0033692)	182	15	1.96	+	7.66	1.04e-05
regulation of secondary cell wall biogenesis (GO:2000652)	29	8	0.31	+	25.65	1.26e-05
polysaccharide biosynthetic process (GO:0000271)	219	16	2.36	+	6.79	1.56e-05
carbohydrate biosynthetic process (GO:0016051)	308	18	3.31	+	5.43	4.61e-05
secondary metabolite biosynthetic process (GO:0044550)	146	13	1.57	+	8.28	4.95e-05
regulation of cell wall organization or biogenesis (GO:1903338)	36	8	0.39	+	20.66	5.43e-05
cell wall organization (GO:0071555)	280	17	3.01	+	5.65	6.87e-05
cellular carbohydrate biosynthetic process (GO:0034637)	218	15	2.34	+	6.4	9.96e-05
external encapsulating structure organization (GO:0045229)	333	18	3.58	+	5.03	0.000142
xylan catabolic process (GO:0045493)	16	6	0.17	+	34.87	0.000255
cell wall polysaccharide catabolic process (GO:0044347)	17	6	0.18	+	32.82	0.000342
cell wall macromolecule catabolic process (GO:0016998)	33	7	0.35	+	19.72	0.000567
secondary metabolic process (GO:0019748)	306	16	3.29	+	4.86	0.00122
glucuronoxylan biosynthetic process (GO:0010417)	12	5	0.13	+	38.74	0.0021
glucuronoxylan metabolic process (GO:0010413)	12	5	0.13	+	38.74	0.0021
cell wall modification (GO:0042545)	174	12	1.87	+	6.41	0.00231
polysaccharide catabolic process (GO:0000272)	143	11	1.54	+	7.15	0.00245
plant-type cell wall organization (GO:0009664)	151	11	1.62	+	6.77	0.00404
regulation of cellular component biogenesis (GO:0044087)	99	9	1.06	+	8.45	0.00689
tracheary element differentiation (GO:1905177)	17	5	0.18	+	27.35	0.00855
organic cyclic compound biosynthetic process (GO:1901362)	880	26	9.46	+	2.75	0.0148
organic substance catabolic process (GO:1901575)	1388	34	14.93	+	2.28	0.0353
pectin metabolic process (GO:0045488)	161	10	1.73	+	5.78	0.0456
galacturonan metabolic process (GO:0010393)	162	10	1.74	+	5.74	0.048
