# Supplementary material for: A phase-separated transcription factor regulates an interspecific barrier
Source: Research Square preprint supplement (doi:10.21203/rs.3.rs-2015853/v1), 2022-10-28
Supplement: Supplementary file 4 [file d1627d81a55508f66f02c3be.xlsx]

## Sheet: gRNAs
Target gene	gRNA No.	gRNA sequence (5' to 3')	PAM
SPRI2	gRNA2	TGTTTGGCAATCAAACCCT	CGG
SPRI2	gRNA4	GATCTCACCGGCTCATGAT	CGG
SPRI2-like	gRNA2	TAGAAGTTTGCAGGAGCTG	AGG
SPRI2-like	gRNA3	TAGTCTCCGATCATGAGCC	GGG
SHI	gRNA1	GATCTTTACACTTCCGCTG	CGG
SHI	gRNA2	CCGACGAGCTAACTTCCGG	CGG
STY1	gRNA1	CGATGATGATGATTCGTAG	TGG
STY1	gRNA2	GCGGAGGTGAGTTCATCGG	CGG
STY2	gRNA1	CACGTGGATCCCCGTTGCG	AGG
STY2	gRNA2	CATCTGAGCTCACTTcccc	CGG
LRP1	gRNA1	CTTATCACCACCAGAACGC	CGG
LRP1	gRNA2	CCAGCCGTTGGATTAGCGC	CGG
SRS3	gRNA1	ATGTGAGTTTGGCAATGGA	AGG
SRS3	gRNA2	AAAATGTCCAGGAGTAGTG	TGG
SRS4	gRNA1	GATCCACGTGCTCCTCACG	TGG
SRS4	gRNA2	TATTGGCCCTCTCCATCAT	CGG
SRS6	gRNA1	ATGGCCGTGTTATCTGCGT	CGG
SRS6	gRNA2	CTTCAGAGAGGGGTTACCG	GGG
TBL45	gRNA1	AAAACCACCTGACTTCGGCG	AGG
TBL45	gRNA2	GCCACACAGGTTCTTTACGA	GGG
TBL45	gRNA3	CCGACTATCTCAAGTTCCGG	TGG
TBL40	gRNA1	GAGATCGTACGGCTGAAGTC	CGG
TBL40	gRNA2	GGTCAAACTCAGCCGTTCAT	GGG
TBL40	gRNA3	TATCCAGGAGGATTGCCCTT	AGG
