# Supplementary figures and images for: A phase-separated transcription factor regulates an interspecific barrier
Source: Research Square preprint supplement (doi:10.21203/rs.3.rs-2015853/v1), 2022-10-28

# Supplementary Figure 1

**a**

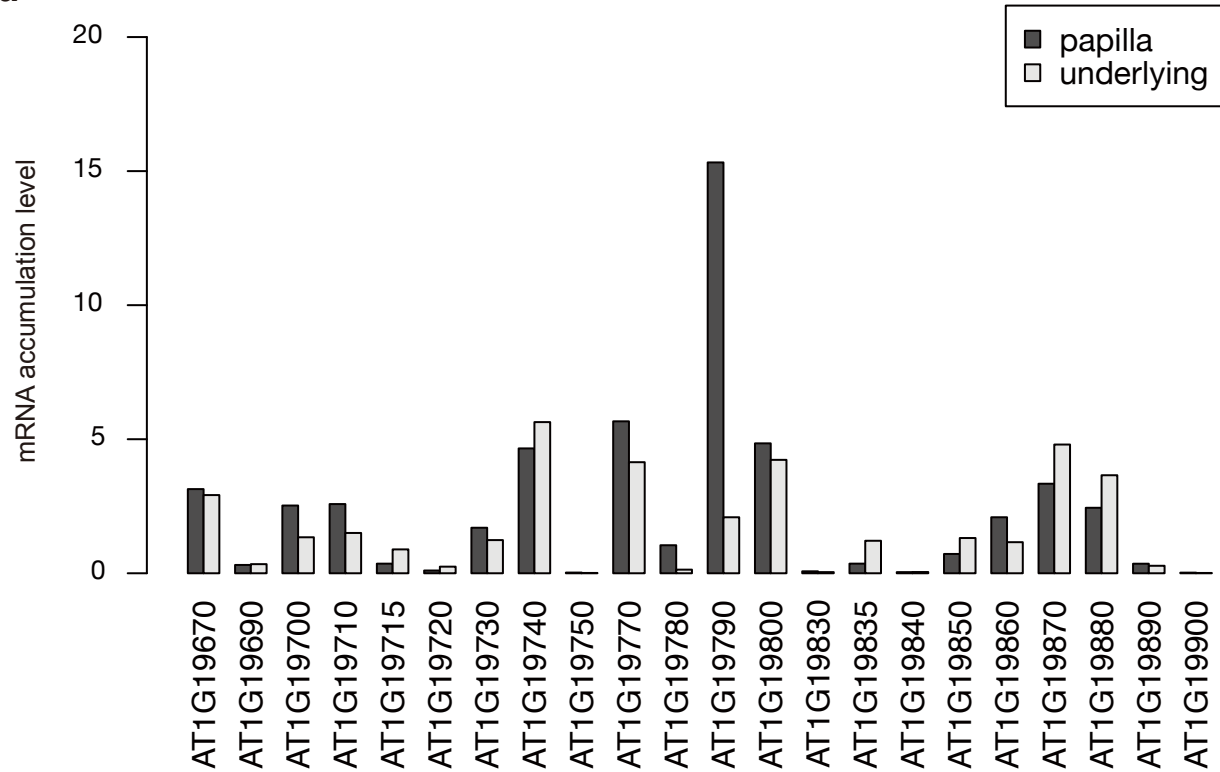

**b**

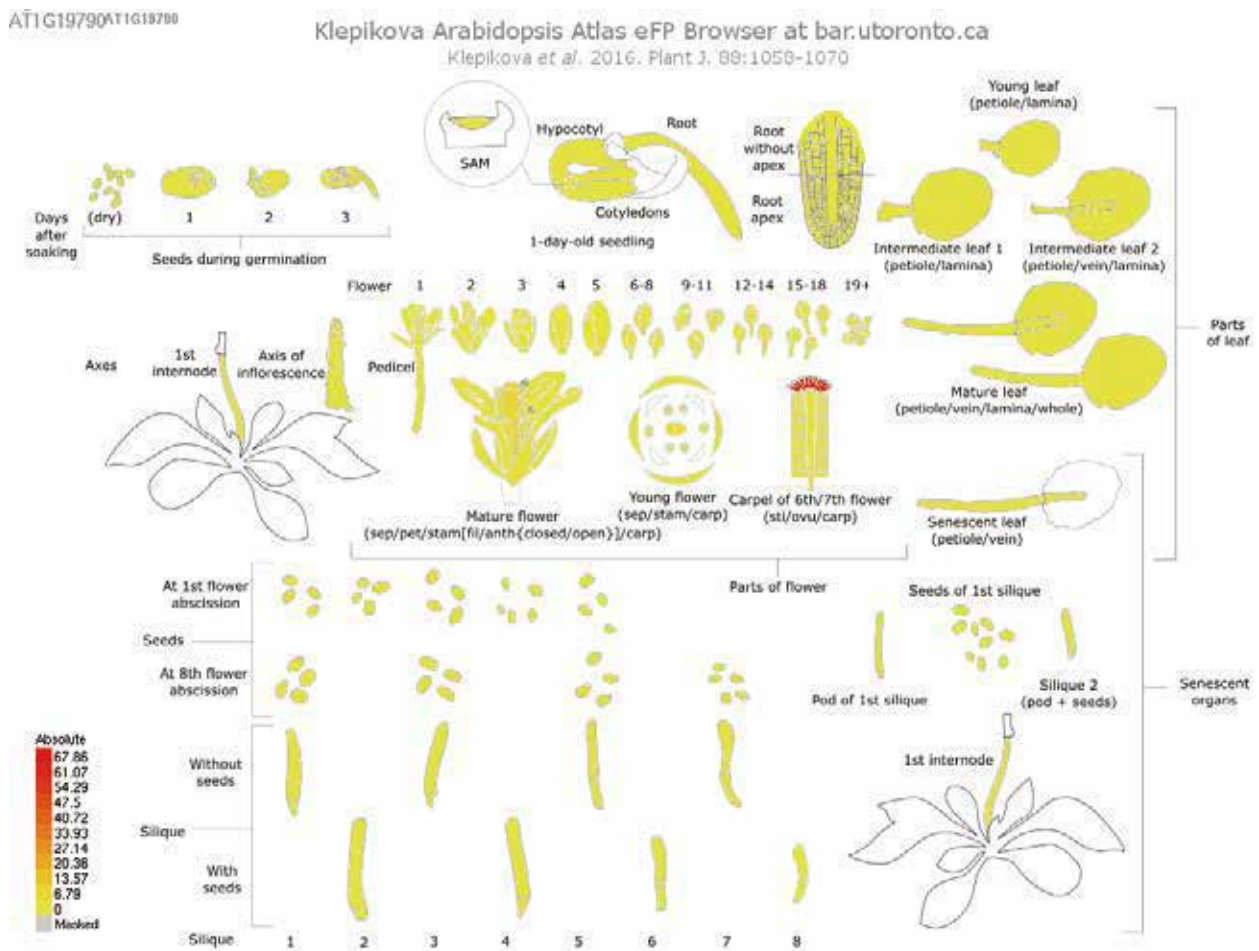

Supplement: Supplementary file 1 [file 307c2a0da1b703b21b5bebd1.pdf]

Supplementary Figure 4

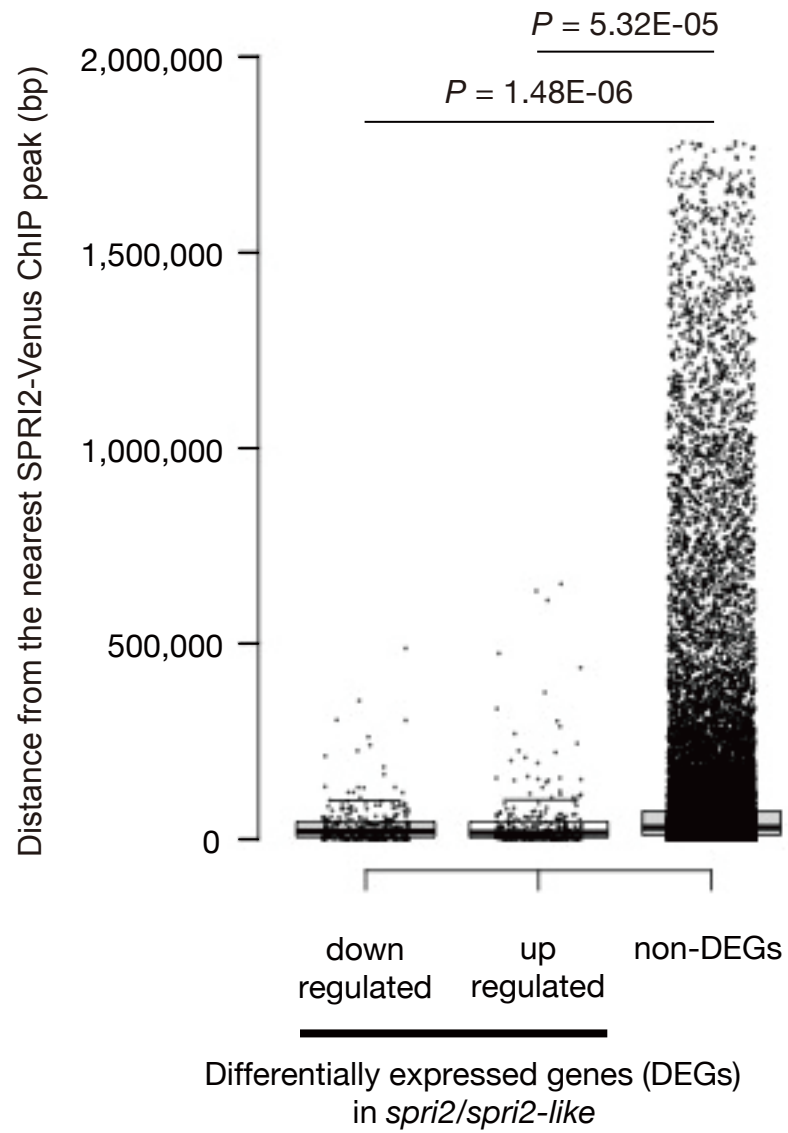

Supplement: Supplementary file 2 [file 6d4881313178dc4e72f610fb.pdf]
